# Supplementary material for: Low serum albumin and total lymphocyte count as predictors of 30 day hospital readmission in patients 65 years of age or older
Source: PeerJ. 2015 Aug 13;3:e1181. doi: 10.7717/peerj.1181 (PMC4558061; doi:10.7717/peerj.1181)
Supplement: Data S1 [file peerj-03-1181-s001.xlsx]

## Sheet: Updated_ReadmitData
OnReadmitList	DaysToReadmit	Age	Female	DRG_Weight	AbsLymph	Alb	LowAlb	LowLymph	LowAlbLymph	AnyMal
0	30	102	1	0.7864	1.8	3.3	1	0	0	1
0	30	100	1	0.7864	0.2	2.9	1	1	1	1
0	30	100	0	1.6318	1.1	3.4	1	1	1	1
1	1	100	0	1.0302	0.3	2.8	1	1	1	1
0	30	100	1	1.8674	2.3	3.1	1	0	0	1
0	30	99	1	0.8064	1.1	3	1	1	1	1
0	30	99	0	0.9999	1.3	3.3	1	1	1	1
0	30	99	0	1.9074	0.2	3.1	1	1	1	1
0	30	99	1	0.6865	1.7	3	1	0	0	1
0	30	99	1	0.8204	0.9	3.6	0	1	0	1
0	30	99	1	1.155	0.4	4.1	0	1	0	1
0	30	98	1	0.7173	0.7	3	1	1	1	1
0	30	98	1	2.0674	0.5	3.1	1	1	1	1
1	7	98	1	1.6407	0.3	3.4	1	1	1	1
0	30	98	1	0.7619	0.8	3.8	0	1	0	1
0	30	97	1	1.6021	1.4	3.1	1	1	1	1
1	12	97	1	1.1545	0.4	2.7	1	1	1	1
0	30	97	1	1.8674	0.3	2.9	1	1	1	1
0	30	97	1	1.4943	6	3.3	1	0	0	1
1	8	97	1	1.9074	2.5	3.2	1	0	0	1
0	30	97	1	0.7957	2	2.3	1	0	0	1
0	30	97	1	0.6853	1.2	3.5	0	1	0	1
0	30	97	1	0.8387	1	3.9	0	1	0	1
0	30	97	1	0.9308	0.7	3.7	0	1	0	1
0	30	96	1	1.0152	1.2	3.2	1	1	1	1
0	30	96	1	1.4887	0.6	2.3	1	1	1	1
0	30	96	1	1.155	2.9	3.3	1	0	0	1
0	30	96	1	0.6369	1.9	3.4	1	0	0	1
1	18	96	1	1.8503	1.7	3.2	1	0	0	1
1	7	96	0	1.9074	3.1	2.3	1	0	0	1
0	30	96	0	1.8503	2.4	3	1	0	0	1
0	30	96	1	0.8198	1.2	3.7	0	1	0	1
0	30	96	1	0.7172	1.9	4	0	0	0	0
0	30	96	1	1.2339	1.7	4.1	0	0	0	0
0	30	95	1	1.9074	1.2	3.3	1	1	1	1
0	30	95	1	1.2185	2.2	3.4	1	0	0	1
0	30	95	1	1.0152	1.8	2.7	1	0	0	1
0	30	95	1	1.0152	1.6	2.7	1	0	0	1
0	30	95	1	1.2809	1.5	2.1	1	0	0	1
0	30	95	1	1.9074	1.2	3.6	0	1	0	1
0	30	95	1	0.935	0.9	4	0	1	0	1
0	30	95	1	1.4943	0.9	3.7	0	1	0	1
0	30	95	1	1.8503	0.7	3.5	0	1	0	1
0	30	95	1	0.7173	0.6	3.9	0	1	0	1
0	30	95	1	1.0688	0.6	3.8	0	1	0	1
0	30	95	1	1.6407	1.7	3.8	0	0	0	0
0	30	95	1	1.8503	1.6	4.3	0	0	0	0
0	30	95	0	0.7172	2.3	4	0	0	0	0
0	30	94	1	0.7864	1.4	3.4	1	1	1	1
0	30	94	1	1.5107	1.4	3	1	1	1	1
1	12	94	1	0.7311	0.9	2.5	1	1	1	1
0	30	94	1	1.0879	0.8	3	1	1	1	1
0	30	94	0	0.8064	1	3.3	1	1	1	1
0	30	94	0	1.0152	1	2.8	1	1	1	1
0	30	94	0	1.4796	0.7	2.7	1	1	1	1
0	30	94	0	1.4796	0.6	3	1	1	1	1
0	30	94	0	0.9861	0.4	3.3	1	1	1	1
0	30	94	0	1.1545	2.5	2.5	1	0	0	1
0	30	94	1	0.629	1	3.6	0	1	0	1
0	30	94	1	1.0243	0.5	3.7	0	1	0	1
0	30	94	1	0.7096	0.3	3.5	0	1	0	1
0	30	94	0	1.9074	0.5	3.6	0	1	0	1
0	30	94	1	1.4943	7.2	3.8	0	0	0	0
0	30	93	1	0.7172	1.3	3.4	1	1	1	1
0	30	93	1	1.4796	1.1	2.4	1	1	1	1
1	3	93	1	1.1667	0.9	2.5	1	1	1	1
0	30	93	1	1.1912	0.8	2.9	1	1	1	1
0	30	93	1	1.0302	0.8	2.7	1	1	1	1
0	30	93	1	1.9074	0.7	3.1	1	1	1	1
0	30	93	1	2.0467	0.7	2.3	1	1	1	1
0	30	93	1	0.7096	0.6	2.3	1	1	1	1
0	30	93	1	0.6865	0.4	3.4	1	1	1	1
0	30	93	0	0.7172	1.4	2.9	1	1	1	1
0	30	93	0	1.0274	1.4	2.7	1	1	1	1
0	30	93	0	1.7541	1.1	2.1	1	1	1	1
0	30	93	0	1.9074	1	1.8	1	1	1	1
0	30	93	0	1.1667	0.9	3.4	1	1	1	1
0	30	93	0	1.6407	0.9	2.6	1	1	1	1
0	30	93	0	1.4796	0.7	3	1	1	1	1
0	30	93	0	1.2215	0.6	2.6	1	1	1	1
0	30	93	0	1.6593	0.5	2.2	1	1	1	1
0	30	93	0	1.1912	0.4	3	1	1	1	1
0	30	93	0	0.8204	0.2	3.2	1	1	1	1
0	30	93	0	0.8306	0.1	3.2	1	1	1	1
0	30	93	1	0.7957	1.8	3.1	1	0	0	1
0	30	93	1	0.7957	1.5	3.2	1	0	0	1
0	30	93	0	0.8204	1.8	3.2	1	0	0	1
0	30	93	0	0.9735	1.6	2.7	1	0	0	1
0	30	93	1	1.8503	1.4	3.8	0	1	0	1
0	30	93	1	0.6568	1.4	3.5	0	1	0	1
0	30	93	1	1.6407	1.1	3.7	0	1	0	1
0	30	93	1	1.0709	0.8	3.5	0	1	0	1
0	30	93	1	1.2935	0.8	3.5	0	1	0	1
0	30	93	1	1.2809	0.6	3.7	0	1	0	1
0	30	93	1	1.4943	0.6	3.6	0	1	0	1
0	30	93	1	1.0302	0.3	3.6	0	1	0	1
0	30	93	0	1.8503	1.2	3.7	0	1	0	1
1	9	93	1	1.9074	2.6	3.5	0	0	0	0
0	30	93	1	0.7172	2.1	3.8	0	0	0	0
0	30	92	1	0.8823	1.3	3.3	1	1	1	1
0	30	92	1	0.7146	1.2	3.1	1	1	1	1
0	30	92	1	0.7191	1.2	2.8	1	1	1	1
0	30	92	1	0.7311	1.1	3.4	1	1	1	1
0	30	92	1	0.6615	1.1	3.4	1	1	1	1
0	30	92	1	1.0152	1	3.1	1	1	1	1
0	30	92	1	1.1207	1	3	1	1	1	1
0	30	92	1	0.8204	0.9	3.2	1	1	1	1
0	30	92	1	0.9344	0.9	1.4	1	1	1	1
1	2	92	1	0.6369	0.7	2.1	1	1	1	1
0	30	92	1	0.6812	0.6	3.4	1	1	1	1
0	30	92	1	1.4796	0.3	1.8	1	1	1	1
1	19	92	1	0.9939	0.2	3.3	1	1	1	1
0	30	92	0	1.0152	0.7	3.4	1	1	1	1
1	15	92	0	0.8599	0.3	2.6	1	1	1	1
0	30	92	0	1.9074	0.1	3.3	1	1	1	1
0	30	92	0	1.2185	0.1	2.6	1	1	1	1
0	30	92	1	0.9404	2.1	3.4	1	0	0	1
0	30	92	1	0.7311	2	3.3	1	0	0	1
0	30	92	0	0.5709	1.5	3.1	1	0	0	1
0	30	92	1	0.8204	1.4	4.1	0	1	0	1
0	30	92	1	0.7173	1.1	3.8	0	1	0	1
0	30	92	1	0.9939	1.1	3.5	0	1	0	1
0	30	92	1	1.5637	1	3.8	0	1	0	1
0	30	92	1	5.2068	0.8	3.7	0	1	0	1
0	30	92	1	0.7191	0.6	3.6	0	1	0	1
0	30	92	1	2.9568	0.4	3.5	0	1	0	1
0	30	92	1	0.6916	0.3	3.9	0	1	0	1
0	30	92	1	0.7096	0.3	3.6	0	1	0	1
0	30	92	0	1.0152	1.1	3.9	0	1	0	1
0	30	92	0	0.583	1.1	3.6	0	1	0	1
0	30	92	1	1.2215	1.6	3.5	0	0	0	0
0	30	92	1	0.583	1.5	4.2	0	0	0	0
1	17	91	1	0.8198	1.2	3.4	1	1	1	1
0	30	91	1	0.8377	1.2	3	1	1	1	1
0	30	91	1	1.8674	1.2	2.6	1	1	1	1
1	5	91	1	1.0274	1	1.3	1	1	1	1
0	30	91	1	0.8377	0.9	3	1	1	1	1
0	30	91	1	1.9074	0.8	2.5	1	1	1	1
0	30	91	1	1.3527	0.2	1.8	1	1	1	1
0	30	91	0	0.8823	1.1	3.2	1	1	1	1
0	30	91	0	1.2808	1.1	2.9	1	1	1	1
0	30	91	1	0.7191	2.3	3.2	1	0	0	1
1	7	91	1	1.9074	2	3	1	0	0	1
1	5	91	1	1.0954	1.9	3.2	1	0	0	1
0	30	91	1	1.7541	1.8	3.1	1	0	0	1
0	30	91	1	1.1545	1.5	3.3	1	0	0	1
0	30	91	1	0.6916	1.3	3.8	0	1	0	1
0	30	91	1	1.0274	1.1	3.8	0	1	0	1
0	30	91	1	1.1667	1.1	3.7	0	1	0	1
0	30	91	1	0.935	1.1	3.6	0	1	0	1
0	30	91	1	0.6161	1	3.6	0	1	0	1
0	30	91	1	1.5586	1	3.5	0	1	0	1
0	30	91	1	0.9344	0.7	3.6	0	1	0	1
0	30	91	1	0.8306	0.5	4.1	0	1	0	1
0	30	91	1	1.1912	0.5	3.5	0	1	0	1
0	30	91	0	2.263	0.8	3.7	0	1	0	1
0	30	91	0	1.5637	0.6	3.8	0	1	0	1
0	30	91	0	1.1912	0.5	3.7	0	1	0	1
0	30	91	1	1.0706	1.9	3.9	0	0	0	0
0	30	91	1	1.1924	1.7	3.7	0	0	0	0
0	30	91	1	0.5499	1.5	3.8	0	0	0	0
0	30	91	1	0.9404	1.5	3.5	0	0	0	0
0	30	91	0	1.1924	2.6	3.5	0	0	0	0
0	30	91	0	0.5712	2.5	3.5	0	0	0	0
0	30	90	1	0.7311	1.3	3.4	1	1	1	1
0	30	90	1	0.8377	1.1	3	1	1	1	1
0	30	90	1	0.6916	0.9	3.2	1	1	1	1
1	4	90	1	1.6457	0.9	3.1	1	1	1	1
0	30	90	1	1.6096	0.8	3.2	1	1	1	1
0	30	90	1	0.935	0.8	3.1	1	1	1	1
0	30	90	1	0.8387	0.8	2.8	1	1	1	1
0	30	90	1	0.6812	0.7	3	1	1	1	1
0	30	90	1	1.0152	0.5	3.4	1	1	1	1
0	30	90	1	1.9074	0.2	2.8	1	1	1	1
0	30	90	0	1.9074	1.2	3.4	1	1	1	1
0	30	90	0	0.6615	1.1	3.4	1	1	1	1
0	30	90	0	1.9074	1.1	2.4	1	1	1	1
0	30	90	0	1.7541	1	3	1	1	1	1
0	30	90	0	1.0649	0.9	3.3	1	1	1	1
1	1	90	0	1.9074	0.5	3.1	1	1	1	1
1	16	90	0	1.1597	0.1	2.5	1	1	1	1
0	30	90	1	0.8387	2.4	3.2	1	0	0	1
0	30	90	1	1.9074	2.1	1.6	1	0	0	1
1	25	90	1	1.0302	2	2.3	1	0	0	1
0	30	90	1	1.1545	1.9	3.1	1	0	0	1
0	30	90	1	1.9074	1.7	2.4	1	0	0	1
0	30	90	1	1.4796	1.6	3.1	1	0	0	1
1	3	90	1	1.0274	1.5	2.5	1	0	0	1
0	30	90	0	1.6407	3.2	2.7	1	0	0	1
0	30	90	0	0.9776	1.8	2.9	1	0	0	1
0	30	90	0	1.6098	1.6	1.6	1	0	0	1
0	30	90	1	1.3944	1.4	3.7	0	1	0	1
0	30	90	1	0.7864	1.3	3.7	0	1	0	1
0	30	90	1	0.6916	1.2	3.5	0	1	0	1
0	30	90	1	2.1423	1	4.6	0	1	0	1
0	30	90	1	1.1667	1	3.8	0	1	0	1
0	30	90	1	0.8424	0.9	3.7	0	1	0	1
0	30	90	1	1.7541	0.7	3.6	0	1	0	1
0	30	90	1	0.7191	0.6	3.6	0	1	0	1
0	30	90	0	0.7311	0.6	3.7	0	1	0	1
0	30	90	0	0.6513	0.6	3.5	0	1	0	1
0	30	90	0	1.8674	0.5	4	0	1	0	1
0	30	90	1	0.6916	2.2	4	0	0	0	0
0	30	90	1	0.7146	2.1	3.6	0	0	0	0
0	30	90	1	0.5709	1.8	4.2	0	0	0	0
0	30	90	1	0.7172	1.5	3.7	0	0	0	0
0	30	90	0	1.1667	1.6	3.7	0	0	0	0
0	30	90	0	0.7974	1.6	3.6	0	0	0	0
0	30	89	1	0.9776	1.4	2	1	1	1	1
0	30	89	1	1.0302	1.3	3.1	1	1	1	1
0	30	89	1	0.935	1.3	1.4	1	1	1	1
0	30	89	1	1.7541	1.1	2.3	1	1	1	1
1	23	89	1	1.2182	0.9	2.9	1	1	1	1
0	30	89	1	0.9735	0.8	3.4	1	1	1	1
0	30	89	1	0.9939	0.8	2.6	1	1	1	1
0	30	89	1	1.1924	0.6	3.3	1	1	1	1
0	30	89	1	0.9584	0.5	3	1	1	1	1
0	30	89	1	1.4796	0.4	3.2	1	1	1	1
0	30	89	1	1.9074	0.4	2.7	1	1	1	1
0	30	89	1	1.0655	0.2	3.3	1	1	1	1
0	30	89	0	1.1545	1.2	2.4	1	1	1	1
0	30	89	0	1.6398	1.1	3.3	1	1	1	1
1	1	89	0	1.1951	1.1	2	1	1	1	1
0	30	89	0	1.0152	0.9	3.3	1	1	1	1
0	30	89	0	1.8674	0.9	3.1	1	1	1	1
0	30	89	0	0.7191	0.8	3.2	1	1	1	1
1	12	89	0	1.0302	0.7	2.6	1	1	1	1
0	30	89	0	1.5586	0.7	2.3	1	1	1	1
1	4	89	0	1.9074	0.7	2.1	1	1	1	1
0	30	89	0	1.0152	0.5	2.9	1	1	1	1
0	30	89	0	1.0152	0.4	3	1	1	1	1
0	30	89	0	1.2809	0.1	3.2	1	1	1	1
0	30	89	1	1.0274	1.9	3.2	1	0	0	1
0	30	89	1	1.4796	1.6	3.3	1	0	0	1
0	30	89	1	5.8305	1.6	2.6	1	0	0	1
0	30	89	0	0.7172	1.8	3.4	1	0	0	1
0	30	89	1	0.8387	1.2	3.7	0	1	0	1
0	30	89	1	1.6096	1.2	3.6	0	1	0	1
0	30	89	1	1.6407	1.1	3.8	0	1	0	1
0	30	89	1	0.7173	1	3.7	0	1	0	1
0	30	89	1	1.0152	0.9	3.9	0	1	0	1
0	30	89	1	0.7198	0.9	3.7	0	1	0	1
0	30	89	1	1.0243	0.6	4.1	0	1	0	1
0	30	89	1	0.7172	0.5	3.9	0	1	0	1
0	30	89	1	1.0274	0.5	3.7	0	1	0	1
0	30	89	0	1.0302	1	3.6	0	1	0	1
0	30	89	0	0.9584	0.6	3.8	0	1	0	1
0	30	89	0	0.7411	0.5	4.3	0	1	0	1
0	30	89	0	0.9344	0.5	3.6	0	1	0	1
0	30	89	1	0.7311	2.2	3.5	0	0	0	0
0	30	89	1	1.9074	2	3.7	0	0	0	0
0	30	89	1	1.0243	1.7	3.9	0	0	0	0
0	30	89	1	0.7182	1.7	3.8	0	0	0	0
0	30	89	1	1.6098	1.5	3.6	0	0	0	0
0	30	89	0	1.0243	6.5	3.5	0	0	0	0
0	30	89	0	0.6369	1.8	3.8	0	0	0	0
0	30	88	1	1.7361	1.1	3.1	1	1	1	1
1	1	88	1	1.1667	1	2.9	1	1	1	1
0	30	88	1	0.6865	1	2.9	1	1	1	1
0	30	88	1	1.8159	0.7	3.3	1	1	1	1
0	30	88	1	1.0706	0.7	3.1	1	1	1	1
0	30	88	1	1.0152	0.7	3	1	1	1	1
1	4	88	1	1.0274	0.7	2.7	1	1	1	1
1	22	88	1	1.4796	0.6	3.1	1	1	1	1
0	30	88	1	1.8503	0.6	3	1	1	1	1
0	30	88	1	1.8018	0.5	3	1	1	1	1
1	8	88	0	1.0152	1.2	2.3	1	1	1	1
0	30	88	0	1.2935	1.2	2.3	1	1	1	1
0	30	88	0	1.3505	1.1	3.4	1	1	1	1
0	30	88	0	0.7311	1.1	3.2	1	1	1	1
0	30	88	0	2.0667	1	3.4	1	1	1	1
0	30	88	0	1.2935	1	2.7	1	1	1	1
0	30	88	0	1.1924	0.9	3.2	1	1	1	1
0	30	88	0	1.0302	0.9	3.1	1	1	1	1
0	30	88	0	0.7153	0.8	3.4	1	1	1	1
0	30	88	0	2.1423	0.8	3.4	1	1	1	1
0	30	88	0	1.6398	0.7	3.1	1	1	1	1
0	30	88	0	1.1924	0.6	3.4	1	1	1	1
0	30	88	0	0.9857	0.6	2.3	1	1	1	1
0	30	88	0	1.4943	0.5	3.1	1	1	1	1
0	30	88	0	1.4943	0.5	2.2	1	1	1	1
1	4	88	0	1.4667	0.2	1.9	1	1	1	1
0	30	88	1	1.0274	2	3	1	0	0	1
0	30	88	1	0.5709	1.8	3	1	0	0	1
0	30	88	1	0.7864	1.6	2.9	1	0	0	1
0	30	88	0	1.6098	2.4	2.7	1	0	0	1
0	30	88	0	1.8503	2.4	2.2	1	0	0	1
0	30	88	0	1.9074	1.7	2.3	1	0	0	1
0	30	88	1	1.0879	1.4	3.8	0	1	0	1
0	30	88	1	0.9735	0.9	4	0	1	0	1
0	30	88	1	1.1912	0.7	3.7	0	1	0	1
0	30	88	1	1.4863	0.4	3.7	0	1	0	1
0	30	88	0	0.9755	1.1	3.7	0	1	0	1
0	30	88	0	1.0879	0.9	3.8	0	1	0	1
0	30	88	0	1.0152	0.9	3.7	0	1	0	1
0	30	88	0	1.2051	0.7	3.9	0	1	0	1
0	30	88	0	0.8204	0.6	3.5	0	1	0	1
0	30	88	1	0.7173	1.7	4.1	0	0	0	0
0	30	88	1	1.1667	1.5	3.8	0	0	0	0
0	30	88	1	0.5499	1.5	3.6	0	0	0	0
1	6	88	0	0.9041	1.9	4	0	0	0	0
0	30	88	0	0.8204	1.9	3.9	0	0	0	0
0	30	88	0	0.7172	1.5	3.6	0	0	0	0
0	30	87	1	1.0879	1.3	3.2	1	1	1	1
0	30	87	1	0.7173	1.2	2.9	1	1	1	1
0	30	87	1	1.8674	1.1	3.1	1	1	1	1
0	30	87	1	1.0706	1.1	2.8	1	1	1	1
1	9	87	1	1.0152	0.9	2.7	1	1	1	1
0	30	87	1	1.2809	0.8	3.3	1	1	1	1
0	30	87	1	0.8204	0.8	3	1	1	1	1
1	22	87	1	1.9074	0.7	3.3	1	1	1	1
0	30	87	1	1.0274	0.7	2.9	1	1	1	1
0	30	87	1	1.6098	0.1	2.6	1	1	1	1
1	9	87	0	0.8203	1.4	2.6	1	1	1	1
0	30	87	0	0.6615	1.3	3.2	1	1	1	1
0	30	87	0	0.6853	1.1	2.9	1	1	1	1
1	5	87	0	0.7957	1.1	2.2	1	1	1	1
0	30	87	0	0.6369	0.9	3.4	1	1	1	1
1	2	87	0	0.7929	0.9	2.7	1	1	1	1
0	30	87	0	1.0952	0.8	3.4	1	1	1	1
0	30	87	0	0.7311	0.7	3.4	1	1	1	1
0	30	87	0	0.935	0.7	3.4	1	1	1	1
0	30	87	0	1.2185	0.7	2.9	1	1	1	1
0	30	87	0	1.0243	0.6	3.2	1	1	1	1
0	30	87	0	1.2795	0.6	2.7	1	1	1	1
0	30	87	0	0.9776	0.4	2.8	1	1	1	1
0	30	87	1	1.6398	1.9	2.3	1	0	0	1
0	30	87	1	0.9681	1.7	2.6	1	0	0	1
0	30	87	1	5.2068	1.5	2.7	1	0	0	1
0	30	87	0	1.0274	4.3	3.2	1	0	0	1
0	30	87	0	1.1545	2.6	3.2	1	0	0	1
0	30	87	0	1.1924	2.6	2.9	1	0	0	1
0	30	87	0	1.0879	2.4	3.2	1	0	0	1
0	30	87	0	0.5499	1.6	3.2	1	0	0	1
0	30	87	0	0.6853	1.6	3.2	1	0	0	1
1	27	87	1	0.7146	1.4	3.6	0	1	0	1
0	30	87	1	0.9344	1.4	3.6	0	1	0	1
0	30	87	1	1.6398	1.3	3.9	0	1	0	1
0	30	87	1	1.0302	1.3	3.9	0	1	0	1
0	30	87	1	1.4072	1.3	3.6	0	1	0	1
0	30	87	1	1.1912	1.2	3.7	0	1	0	1
0	30	87	1	1.0152	1.2	3.6	0	1	0	1
0	30	87	1	0.583	1	4.2	0	1	0	1
0	30	87	1	1.0879	1	3.7	0	1	0	1
0	30	87	1	1.1912	1	3.5	0	1	0	1
0	30	87	1	0.7173	0.7	4.3	0	1	0	1
0	30	87	1	1.1667	0.6	3.9	0	1	0	1
0	30	87	1	0.8198	0.5	3.5	0	1	0	1
0	30	87	1	1.9074	0.4	3.5	0	1	0	1
0	30	87	0	0.7172	1.2	3.8	0	1	0	1
0	30	87	0	0.6369	1	3.8	0	1	0	1
1	2	87	0	0.8203	0.9	3.5	0	1	0	1
0	30	87	0	1.4943	0.9	3.5	0	1	0	1
0	30	87	0	1.155	0.8	3.7	0	1	0	1
0	30	87	0	1.9074	0.8	3.7	0	1	0	1
0	30	87	0	1.0274	0.7	3.6	0	1	0	1
0	30	87	0	1.155	0.6	3.8	0	1	0	1
0	30	87	0	1.2185	0.6	3.6	0	1	0	1
0	30	87	0	1.155	0.5	3.5	0	1	0	1
0	30	87	0	0.6853	0.4	3.7	0	1	0	1
0	30	87	1	0.7499	5.2	3.8	0	0	0	0
0	30	87	1	1.8674	2.1	3.9	0	0	0	0
0	30	87	0	1.0152	2.5	3.5	0	0	0	0
0	30	86	1	1.0649	1.3	3.4	1	1	1	1
0	30	86	1	0.722	1.3	3.3	1	1	1	1
0	30	86	1	0.8306	1.1	2.8	1	1	1	1
0	30	86	1	1.0772	0.9	3.3	1	1	1	1
0	30	86	1	1.0243	0.9	2.4	1	1	1	1
0	30	86	1	0.8888	0.9	2.4	1	1	1	1
1	4	86	1	1.8417	0.8	3.1	1	1	1	1
0	30	86	1	0.8204	0.8	2.8	1	1	1	1
0	30	86	1	1.1667	0.7	3.2	1	1	1	1
0	30	86	1	0.6916	0.7	3	1	1	1	1
0	30	86	1	1.9074	0.6	2.8	1	1	1	1
0	30	86	1	1.1912	0.5	3.3	1	1	1	1
0	30	86	1	1.1924	0.5	3.3	1	1	1	1
0	30	86	1	0.9344	0.5	2.7	1	1	1	1
0	30	86	1	1.0152	0.5	2.6	1	1	1	1
0	30	86	1	5.2068	0.4	2.6	1	1	1	1
0	30	86	1	1.1545	0.4	2.5	1	1	1	1
0	30	86	0	0.8204	1.4	3.3	1	1	1	1
0	30	86	0	1.9656	1.4	3	1	1	1	1
0	30	86	0	1.7541	1.4	2.7	1	1	1	1
0	30	86	0	0.6865	1.2	3.4	1	1	1	1
0	30	86	0	1.9074	1	3	1	1	1	1
0	30	86	0	1.9074	1	2.4	1	1	1	1
0	30	86	0	0.9755	1	2.3	1	1	1	1
0	30	86	0	1.0152	0.9	3.1	1	1	1	1
0	30	86	0	0.9681	0.9	3.1	1	1	1	1
0	30	86	0	0.7172	0.8	3.4	1	1	1	1
0	30	86	0	0.9892	0.7	2.5	1	1	1	1
1	24	86	0	1.6098	0.4	3.2	1	1	1	1
1	10	86	0	1.9074	0.2	2.3	1	1	1	1
0	30	86	0	1.14	0.1	3.3	1	1	1	1
0	30	86	1	0.8064	2.3	3.1	1	0	0	1
0	30	86	1	1.2809	1.6	3.2	1	0	0	1
0	30	86	0	1.8159	2.5	2.3	1	0	0	1
0	30	86	0	4.9277	2.4	2.8	1	0	0	1
0	30	86	0	0.7173	2.1	3	1	0	0	1
0	30	86	0	0.7411	1.5	2.4	1	0	0	1
0	30	86	1	0.7172	1.4	3.6	0	1	0	1
0	30	86	1	0.5709	1.3	4.4	0	1	0	1
0	30	86	1	0.5499	1.3	3.8	0	1	0	1
1	18	86	1	0.6916	1.3	3.6	0	1	0	1
0	30	86	1	0.5709	1.2	3.6	0	1	0	1
0	30	86	1	0.7311	1	3.8	0	1	0	1
1	2	86	1	1.0688	1	3.7	0	1	0	1
0	30	86	1	0.8387	1	3.6	0	1	0	1
0	30	86	1	0.7191	0.9	3.5	0	1	0	1
1	14	86	1	1.194	0.8	3.6	0	1	0	1
0	30	86	1	1.9074	0.7	3.9	0	1	0	1
0	30	86	1	1.1924	0.7	3.7	0	1	0	1
0	30	86	1	0.7146	0.5	3.9	0	1	0	1
0	30	86	0	0.8204	1.4	3.9	0	1	0	1
0	30	86	0	0.7146	1.4	3.7	0	1	0	1
0	30	86	0	1.14	1.3	4.3	0	1	0	1
0	30	86	0	0.7619	1.3	3.7	0	1	0	1
0	30	86	0	0.7173	1.2	3.8	0	1	0	1
0	30	86	0	1.8674	1	4	0	1	0	1
0	30	86	1	1.1924	1.9	3.7	0	0	0	0
0	30	86	1	0.9344	1.8	3.8	0	0	0	0
0	30	86	0	1.0243	1.7	3.9	0	0	0	0
0	30	85	1	1.1545	1.3	2.6	1	1	1	1
1	2	85	1	0.6853	1.3	1.9	1	1	1	1
0	30	85	1	0.7591	1.1	2.5	1	1	1	1
1	1	85	1	0.9404	1	3.1	1	1	1	1
0	30	85	1	1.8503	1	2.7	1	1	1	1
1	29	85	1	1.7669	0.9	2.4	1	1	1	1
0	30	85	1	1.4667	0.8	3.3	1	1	1	1
1	2	85	1	1.0302	0.7	3.3	1	1	1	1
0	30	85	1	0.6916	0.7	3.3	1	1	1	1
0	30	85	1	0.7173	0.7	3.1	1	1	1	1
0	30	85	1	0.7172	0.6	3.4	1	1	1	1
0	30	85	1	0.7153	0.6	3.4	1	1	1	1
0	30	85	1	1.9074	0.5	3.3	1	1	1	1
1	11	85	1	1.1545	0.5	3.1	1	1	1	1
0	30	85	1	0.7957	0.5	3.1	1	1	1	1
0	30	85	1	0.7096	0.4	3.4	1	1	1	1
0	30	85	1	1.2339	0.4	3.3	1	1	1	1
0	30	85	1	0.7957	0.4	2.9	1	1	1	1
0	30	85	1	2.1479	0.4	2.8	1	1	1	1
0	30	85	1	0.9017	0.4	2.6	1	1	1	1
0	30	85	0	0.8599	1.3	2.9	1	1	1	1
1	23	85	0	1.9074	1.3	2.7	1	1	1	1
0	30	85	0	0.722	1	2.7	1	1	1	1
0	30	85	0	1.9074	0.9	3.1	1	1	1	1
0	30	85	0	1.0274	0.6	3.2	1	1	1	1
0	30	85	0	1.6407	0.6	3.1	1	1	1	1
0	30	85	0	2.9317	0.5	2.6	1	1	1	1
0	30	85	0	1.2215	0.4	1.8	1	1	1	1
1	2	85	1	0.8306	2.4	3.1	1	0	0	1
0	30	85	1	0.5499	2.2	3.3	1	0	0	1
0	30	85	1	1.9074	1.7	2.3	1	0	0	1
1	5	85	1	1.4943	1.6	0	1	0	0	1
0	30	85	1	2.0667	1.5	3.3	1	0	0	1
0	30	85	1	1.0302	1.5	2.9	1	0	0	1
0	30	85	1	1.1667	1.5	2.8	1	0	0	1
1	7	85	0	0.6513	2.2	3.4	1	0	0	1
0	30	85	0	0.6865	1.7	2.9	1	0	0	1
0	30	85	0	2.0667	1.7	2.9	1	0	0	1
0	30	85	1	0.7311	1.4	3.8	0	1	0	1
0	30	85	1	0.7813	1.3	4.2	0	1	0	1
0	30	85	1	0.7172	1.3	3.7	0	1	0	1
0	30	85	1	0.935	1.2	3.5	0	1	0	1
0	30	85	1	0.9404	1	3.8	0	1	0	1
1	22	85	1	0.6827	0.9	4	0	1	0	1
0	30	85	1	2.0667	0.8	3.6	0	1	0	1
0	30	85	1	1.8503	0.7	4	0	1	0	1
0	30	85	1	1.1912	0.7	3.9	0	1	0	1
0	30	85	1	1.0879	0.7	3.8	0	1	0	1
1	8	85	1	1.1667	0.6	3.5	0	1	0	1
0	30	85	1	2.0667	0.6	3.5	0	1	0	1
0	30	85	1	0.9735	0.5	3.7	0	1	0	1
1	25	85	1	2.0667	0.4	3.7	0	1	0	1
0	30	85	1	2.263	0.2	3.7	0	1	0	1
0	30	85	0	0.986	1.4	4.3	0	1	0	1
0	30	85	0	0.6853	1.3	3.7	0	1	0	1
0	30	85	0	0.6749	1.2	4	0	1	0	1
0	30	85	0	1.6376	1.2	3.6	0	1	0	1
0	30	85	0	1.0302	1	3.7	0	1	0	1
0	30	85	0	0.7172	0.9	3.9	0	1	0	1
0	30	85	0	0.6568	0.9	3.5	0	1	0	1
0	30	85	0	0.8387	0.8	3.5	0	1	0	1
0	30	85	0	1.0302	0.5	3.7	0	1	0	1
0	30	85	0	1.0152	0.1	3.6	0	1	0	1
1	9	85	1	1.6407	2.5	3.8	0	0	0	0
0	30	85	1	0.5709	2.4	3.9	0	0	0	0
0	30	85	1	1.1924	2.1	3.7	0	0	0	0
0	30	85	1	0.9041	2.1	3.5	0	0	0	0
0	30	85	1	0.9667	1.8	3.8	0	0	0	0
0	30	85	1	0.6138	1.7	3.7	0	0	0	0
0	30	85	0	0.7173	1.7	3.8	0	0	0	0
0	30	84	1	0.7172	1.4	3.2	1	1	1	1
0	30	84	1	0.8204	1.2	3.3	1	1	1	1
0	30	84	1	0.583	1.2	2.5	1	1	1	1
0	30	84	1	1.0274	1.1	2.8	1	1	1	1
0	30	84	1	1.14	1	2.8	1	1	1	1
0	30	84	1	0.7311	0.8	3	1	1	1	1
0	30	84	1	0.9308	0.6	2.8	1	1	1	1
0	30	84	1	1.6748	0.6	1.8	1	1	1	1
0	30	84	1	2.0014	0.4	3	1	1	1	1
1	4	84	1	0.7173	0.4	2.3	1	1	1	1
1	2	84	1	0.6916	0.1	2.2	1	1	1	1
0	30	84	0	0.6916	1.4	3	1	1	1	1
0	30	84	0	1.2795	1.4	2.4	1	1	1	1
1	10	84	0	1.155	1.3	2.9	1	1	1	1
0	30	84	0	1.6021	1.3	2.8	1	1	1	1
1	6	84	0	0.7172	1.2	3.3	1	1	1	1
1	8	84	0	1.9074	1.2	2.1	1	1	1	1
1	4	84	0	1.0152	0.9	2.8	1	1	1	1
0	30	84	0	0.7173	0.9	2.6	1	1	1	1
0	30	84	0	0.8387	0.8	3.3	1	1	1	1
0	30	84	0	5.2068	0.8	3	1	1	1	1
0	30	84	0	0.8387	0.8	2.9	1	1	1	1
0	30	84	0	0.8204	0.7	3.2	1	1	1	1
0	30	84	0	0.6568	0.7	3.1	1	1	1	1
0	30	84	0	1.0879	0.7	3	1	1	1	1
0	30	84	0	0.583	0.6	3.4	1	1	1	1
0	30	84	0	1.4796	0.6	3	1	1	1	1
0	30	84	0	1.6407	0.6	2.4	1	1	1	1
0	30	84	0	0.6865	0.4	3.2	1	1	1	1
0	30	84	0	1.0274	2.6	2.5	1	0	0	1
0	30	84	1	1.2809	1.4	3.7	0	1	0	1
0	30	84	1	1.9074	1.4	3.7	0	1	0	1
0	30	84	1	0.7173	1.3	4	0	1	0	1
0	30	84	1	1.2809	1.2	4	0	1	0	1
0	30	84	1	0.6853	1	3.5	0	1	0	1
0	30	84	1	1.1667	0.9	4	0	1	0	1
0	30	84	1	0.8204	0.8	3.6	0	1	0	1
0	30	84	1	1.0302	0.8	3.6	0	1	0	1
0	30	84	1	1.9074	0.5	3.5	0	1	0	1
0	30	84	1	2.263	0.1	3.7	0	1	0	1
0	30	84	0	0.5499	1.4	3.5	0	1	0	1
0	30	84	0	0.7173	1.2	3.5	0	1	0	1
1	25	84	0	0.6587	1	3.9	0	1	0	1
0	30	84	0	1.0879	1	3.6	0	1	0	1
0	30	84	0	1.8674	0.7	3.8	0	1	0	1
0	30	84	0	1.2935	0.3	3.6	0	1	0	1
0	30	84	0	0.7173	0.2	3.7	0	1	0	1
0	30	84	1	1.6407	2.5	3.5	0	0	0	0
0	30	84	1	0.7311	2.4	4	0	0	0	0
0	30	84	1	1.2185	2	3.6	0	0	0	0
0	30	84	1	0.7311	1.9	3.7	0	0	0	0
1	24	84	1	1.8018	1.6	4	0	0	0	0
0	30	84	1	0.6615	1.6	3.7	0	0	0	0
0	30	84	1	0.935	1.5	3.6	0	0	0	0
0	30	84	0	0.9584	3.6	3.6	0	0	0	0
0	30	84	0	0.8204	2.3	3.5	0	0	0	0
0	30	84	0	1.0243	2	3.9	0	0	0	0
0	30	84	0	1.8503	1.9	3.8	0	0	0	0
0	30	84	0	1.1912	1.7	4.1	0	0	0	0
0	30	84	0	1.2809	1.5	3.7	0	0	0	0
0	30	83	1	0.8424	1.3	3	1	1	1	1
1	9	83	1	1.0274	1.3	2.9	1	1	1	1
0	30	83	1	1.1982	1.3	2.5	1	1	1	1
0	30	83	1	0.8377	1.2	3.4	1	1	1	1
0	30	83	1	1.1614	1.1	3.1	1	1	1	1
0	30	83	1	0.7311	0.8	3.4	1	1	1	1
0	30	83	1	0.6853	0.7	2.9	1	1	1	1
1	3	83	1	1.1667	0.7	2.9	1	1	1	1
1	9	83	1	1.4796	0.7	1.9	1	1	1	1
0	30	83	1	1.4748	0.6	3.4	1	1	1	1
0	30	83	1	0.7096	0.6	2.3	1	1	1	1
0	30	83	1	1.4796	0.5	3.2	1	1	1	1
0	30	83	1	5.8305	0.5	2.8	1	1	1	1
0	30	83	1	1.8018	0.5	2.7	1	1	1	1
0	30	83	1	1.0879	0.4	3.2	1	1	1	1
0	30	83	1	1.4796	0.4	3.2	1	1	1	1
0	30	83	1	0.8064	0.3	3.1	1	1	1	1
0	30	83	1	1.1667	0.2	3.1	1	1	1	1
0	30	83	0	1.8503	1.3	3.4	1	1	1	1
0	30	83	0	0.6615	1.1	3.2	1	1	1	1
0	30	83	0	1.2185	1	3.4	1	1	1	1
0	30	83	0	1.2182	1	3.3	1	1	1	1
1	17	83	0	1.6407	0.9	3.3	1	1	1	1
0	30	83	0	1.2801	0.9	3.1	1	1	1	1
0	30	83	0	1.9074	0.9	2.8	1	1	1	1
1	5	83	0	2.263	0.9	2.6	1	1	1	1
1	20	83	0	0.6865	0.8	2.1	1	1	1	1
0	30	83	0	1.6407	0.6	2.5	1	1	1	1
0	30	83	0	1.0706	0.5	3.3	1	1	1	1
0	30	83	1	1.7541	4.7	2.8	1	0	0	1
0	30	83	1	1.9074	2.7	2.7	1	0	0	1
0	30	83	1	0.8204	2.3	2.6	1	0	0	1
1	9	83	1	1.4462	1.6	2.8	1	0	0	1
0	30	83	1	1.2051	1.5	2.9	1	0	0	1
0	30	83	0	1.0302	1.9	2.8	1	0	0	1
0	30	83	0	1.0274	1.8	2.8	1	0	0	1
1	20	83	0	1.0649	1.5	2.9	1	0	0	1
0	30	83	0	1.7541	1.5	2.9	1	0	0	1
0	30	83	1	1.0274	1.2	3.9	0	1	0	1
0	30	83	1	1.0879	1.1	3.6	0	1	0	1
0	30	83	1	0.7172	1	4	0	1	0	1
0	30	83	1	1.155	1	3.7	0	1	0	1
0	30	83	1	0.7957	0.7	3.5	0	1	0	1
0	30	83	1	1.1924	0.6	4	0	1	0	1
0	30	83	1	0.6568	0.6	3.6	0	1	0	1
0	30	83	0	1.1912	1.2	3.5	0	1	0	1
0	30	83	0	0.6568	1.1	3.9	0	1	0	1
1	7	83	0	0.7957	1	3.5	0	1	0	1
0	30	83	0	1.0302	0.8	3.8	0	1	0	1
1	11	83	0	1.0706	0.8	3.7	0	1	0	1
0	30	83	0	1.0879	0.7	3.7	0	1	0	1
0	30	83	0	1.1545	0.5	3.7	0	1	0	1
0	30	83	0	1.4796	0.1	3.6	0	1	0	1
0	30	83	1	1.8674	1.9	3.8	0	0	0	0
0	30	83	1	0.6714	1.9	3.5	0	0	0	0
0	30	83	1	1.0879	1.5	4.1	0	0	0	0
0	30	83	0	0.9755	1.8	3.5	0	0	0	0
0	30	83	0	0.7173	1.6	3.7	0	0	0	0
0	30	82	1	0.9095	1.4	2.8	1	1	1	1
0	30	82	1	1.0274	1.4	2.7	1	1	1	1
0	30	82	1	0.7191	1.3	3	1	1	1	1
0	30	82	1	1.2185	1.2	3.1	1	1	1	1
0	30	82	1	0.7173	1	3.4	1	1	1	1
1	18	82	1	0.7392	1	3	1	1	1	1
0	30	82	1	1.2339	0.9	3.2	1	1	1	1
1	2	82	1	0.7575	0.9	2.4	1	1	1	1
0	30	82	1	1.0688	0.9	2.3	1	1	1	1
0	30	82	1	1.1909	0.8	3.1	1	1	1	1
1	21	82	1	0.9404	0.8	2.9	1	1	1	1
0	30	82	1	1.2935	0.8	2.1	1	1	1	1
0	30	82	1	1.2972	0.7	3.1	1	1	1	1
0	30	82	1	1.2185	0.6	2.3	1	1	1	1
1	3	82	1	1.3126	0.6	2.1	1	1	1	1
0	30	82	1	1.8674	0.5	2.3	1	1	1	1
0	30	82	1	1.4887	0.3	1.6	1	1	1	1
0	30	82	1	1.9074	0.2	3.1	1	1	1	1
0	30	82	1	1.9074	0	2.7	1	1	1	1
0	30	82	0	1.9074	1.3	3.3	1	1	1	1
0	30	82	0	1.8503	1.3	2.9	1	1	1	1
0	30	82	0	1.6096	0.9	2	1	1	1	1
0	30	82	0	1.1176	0.8	2.9	1	1	1	1
0	30	82	0	1.1027	0.7	3.4	1	1	1	1
0	30	82	0	0.9857	0.7	2.7	1	1	1	1
0	30	82	0	1.0688	0.7	2.3	1	1	1	1
0	30	82	0	2.263	0.1	3.2	1	1	1	1
0	30	82	1	1.0706	2.4	3.3	1	0	0	1
0	30	82	1	1.7541	1.9	1.7	1	0	0	1
0	30	82	1	1.3944	1.8	3.4	1	0	0	1
1	10	82	1	1.6096	1.7	2.5	1	0	0	1
0	30	82	1	1.2795	1.7	2.3	1	0	0	1
0	30	82	1	0.7173	1.5	3.1	1	0	0	1
0	30	82	1	5.8305	1.5	2.7	1	0	0	1
0	30	82	1	1.8242	1.5	1.9	1	0	0	1
0	30	82	0	5.8305	15	3.4	1	0	0	1
0	30	82	0	1.2182	2.5	3.1	1	0	0	1
1	22	82	0	1.1176	2	2.5	1	0	0	1
0	30	82	0	0.6714	1.6	3.1	1	0	0	1
0	30	82	1	2.263	1.4	3.9	0	1	0	1
0	30	82	1	1.6376	1.2	3.8	0	1	0	1
0	30	82	1	0.7173	1.1	4.2	0	1	0	1
0	30	82	1	1.4796	1.1	3.7	0	1	0	1
0	30	82	1	0.7173	0.8	3.7	0	1	0	1
0	30	82	1	1.9074	0.7	4.1	0	1	0	1
0	30	82	1	1.9074	0	3.5	0	1	0	1
0	30	82	0	0.7096	1.4	3.7	0	1	0	1
0	30	82	0	0.7864	1	3.8	0	1	0	1
0	30	82	0	1.0274	0.9	3.8	0	1	0	1
0	30	82	0	1.8503	0.9	3.6	0	1	0	1
0	30	82	0	0.9939	0.7	4.3	0	1	0	1
0	30	82	0	1.2185	0.6	3.6	0	1	0	1
0	30	82	1	0.6853	2.5	3.6	0	0	0	0
0	30	82	1	0.5499	2	4.1	0	0	0	0
0	30	82	1	0.7173	1.9	4.1	0	0	0	0
0	30	82	1	1.0879	1.9	3.5	0	0	0	0
0	30	82	1	0.6916	1.7	4.5	0	0	0	0
0	30	82	1	0.7864	1.7	3.5	0	0	0	0
0	30	82	1	0.5709	1.6	3.9	0	0	0	0
0	30	82	1	0.5544	1.6	3.7	0	0	0	0
0	30	82	1	1.9074	1.6	3.6	0	0	0	0
0	30	82	0	0.986	206.1	3.7	0	0	0	0
0	30	82	0	1.1924	1.9	3.5	0	0	0	0
0	30	82	0	1.1667	1.7	3.7	0	0	0	0
0	30	82	0	0.7182	1.7	3.5	0	0	0	0
0	30	82	0	1.0302	1.6	3.6	0	0	0	0
0	30	81	1	1.9074	1.2	3.3	1	1	1	1
0	30	81	1	0.8377	1.2	3.2	1	1	1	1
0	30	81	1	1.4943	1	2.9	1	1	1	1
1	2	81	1	0.9785	1	2.6	1	1	1	1
0	30	81	1	1.2935	1	2.4	1	1	1	1
0	30	81	1	2.0667	1	2	1	1	1	1
0	30	81	1	0.9861	0.9	3.3	1	1	1	1
0	30	81	1	0.6916	0.9	3.2	1	1	1	1
0	30	81	1	2.0667	0.6	3.2	1	1	1	1
0	30	81	1	1.0152	0.5	3	1	1	1	1
0	30	81	1	1.4796	0.5	3	1	1	1	1
1	12	81	1	2.263	0.3	2.1	1	1	1	1
0	30	81	1	0.7864	0.2	3.3	1	1	1	1
1	19	81	1	5.8305	0.2	2	1	1	1	1
0	30	81	0	0.6865	1.3	3.3	1	1	1	1
0	30	81	0	1.8674	1.1	3	1	1	1	1
0	30	81	0	1.1545	0.7	3.4	1	1	1	1
0	30	81	0	0.7172	0.7	3.3	1	1	1	1
0	30	81	0	2.0014	0.7	2.7	1	1	1	1
0	30	81	0	1.4372	0.7	2.5	1	1	1	1
0	30	81	0	0.7864	0.5	3.4	1	1	1	1
1	15	81	0	1.0152	0.5	3.1	1	1	1	1
0	30	81	0	1.0952	0.5	2.2	1	1	1	1
1	11	81	0	2.263	0.2	2.6	1	1	1	1
0	30	81	1	1.7541	2.4	3.4	1	0	0	1
0	30	81	1	1.2339	1.8	3.2	1	0	0	1
0	30	81	1	1.4796	1.8	2.9	1	0	0	1
0	30	81	1	0.8204	1.7	2.8	1	0	0	1
0	30	81	1	0.8377	1.7	2.7	1	0	0	1
0	30	81	1	0.5709	1.5	3.2	1	0	0	1
0	30	81	1	1.2185	1.5	2.7	1	0	0	1
0	30	81	0	2.0014	2.7	2.2	1	0	0	1
0	30	81	0	0.8599	2.2	2.7	1	0	0	1
0	30	81	0	2.1479	1.7	3	1	0	0	1
0	30	81	0	0.722	1.7	3	1	0	0	1
1	14	81	0	1.0838	1.6	3.1	1	0	0	1
0	30	81	0	1.0274	1.5	2.4	1	0	0	1
0	30	81	1	0.7173	0.9	4.2	0	1	0	1
0	30	81	1	0.7096	0.9	4.1	0	1	0	1
0	30	81	1	0.6269	0.6	3.9	0	1	0	1
0	30	81	0	0.5499	1.3	3.6	0	1	0	1
0	30	81	0	1.0274	1.2	3.9	0	1	0	1
1	13	81	0	0.7957	1.2	3.8	0	1	0	1
0	30	81	0	0.6853	0.9	3.5	0	1	0	1
0	30	81	0	1.9074	0.7	4	0	1	0	1
0	30	81	0	1.0879	0.5	3.6	0	1	0	1
0	30	81	0	1.7361	0.2	3.6	0	1	0	1
0	30	81	1	0.5709	1.7	3.7	0	0	0	0
0	30	81	0	1.9074	2.3	3.5	0	0	0	0
0	30	80	1	1.0302	1.4	2.7	1	1	1	1
0	30	80	1	0.9344	1.3	3.2	1	1	1	1
1	15	80	1	0.7957	1.2	3	1	1	1	1
0	30	80	1	0.7096	1.1	3.3	1	1	1	1
0	30	80	1	2.0667	1.1	2.6	1	1	1	1
0	30	80	1	1.155	0.9	3.4	1	1	1	1
1	3	80	1	1.4072	0.9	2.7	1	1	1	1
0	30	80	1	2.263	0.8	2.7	1	1	1	1
0	30	80	1	1.8503	0.5	2.6	1	1	1	1
0	30	80	1	1.8145	0.3	2.2	1	1	1	1
0	30	80	1	1.9074	0.3	1.8	1	1	1	1
1	25	80	1	1.9074	0.1	3.2	1	1	1	1
0	30	80	1	2.9317	0.1	2.9	1	1	1	1
0	30	80	0	1.0274	1.4	3.1	1	1	1	1
0	30	80	0	1.155	1.3	3.1	1	1	1	1
0	30	80	0	1.4796	1.3	2.7	1	1	1	1
0	30	80	0	0.5499	1.2	3.2	1	1	1	1
0	30	80	0	1.7541	1.2	3.1	1	1	1	1
1	2	80	0	0.5499	1.2	2.2	1	1	1	1
0	30	80	0	0.6714	1	3.3	1	1	1	1
0	30	80	0	1.4863	1	3.3	1	1	1	1
0	30	80	0	0.722	1	3.2	1	1	1	1
1	27	80	0	1.0152	1	3	1	1	1	1
1	4	80	0	0.9755	0.9	3.3	1	1	1	1
1	11	80	0	1.9074	0.7	2.7	1	1	1	1
0	30	80	0	5.2068	0.6	2.7	1	1	1	1
0	30	80	0	0.6587	0.5	3.3	1	1	1	1
0	30	80	0	0.7096	0.5	3	1	1	1	1
0	30	80	0	1.6407	0.5	2.9	1	1	1	1
0	30	80	0	1.8503	0.5	2.8	1	1	1	1
1	26	80	0	1.2935	0.5	2.7	1	1	1	1
0	30	80	0	1.9074	0.3	2.3	1	1	1	1
0	30	80	1	0.986	14.8	2.6	1	0	0	1
0	30	80	1	0.6916	13.3	2.6	1	0	0	1
1	24	80	1	1.9074	11.3	2.7	1	0	0	1
1	21	80	1	2.1961	10.3	2.3	1	0	0	1
0	30	80	1	0.986	6.1	2.2	1	0	0	1
0	30	80	1	0.986	4.8	2.3	1	0	0	1
0	30	80	1	0.5499	2.6	3	1	0	0	1
0	30	80	1	1.9074	2.3	3.4	1	0	0	1
0	30	80	1	1.6021	1.7	3	1	0	0	1
1	12	80	1	1.155	1.5	2.7	1	0	0	1
0	30	80	0	1.2339	2.3	2.6	1	0	0	1
1	13	80	0	1.1545	1.8	2.3	1	0	0	1
0	30	80	1	0.6916	1.2	3.7	0	1	0	1
0	30	80	1	1.0243	0.6	4.1	0	1	0	1
0	30	80	0	1.4796	1.2	3.9	0	1	0	1
0	30	80	0	0.7096	1.2	3.8	0	1	0	1
0	30	80	0	0.7172	0.6	3.9	0	1	0	1
0	30	80	0	0.9776	0.6	3.5	0	1	0	1
0	30	80	0	1.4796	0.5	4.1	0	1	0	1
0	30	80	0	1.1545	0.5	3.7	0	1	0	1
0	30	80	0	0.9735	0.5	3.5	0	1	0	1
0	30	80	0	2.0667	0.3	4	0	1	0	1
0	30	80	1	1.2935	2.4	4	0	0	0	0
0	30	80	1	0.6269	2.3	3.8	0	0	0	0
0	30	80	1	0.7173	2.1	3.9	0	0	0	0
0	30	80	1	0.8204	1.9	3.7	0	0	0	0
0	30	80	1	1.1545	1.7	3.5	0	0	0	0
0	30	80	1	1.0952	1.5	4	0	0	0	0
0	30	80	0	0.7173	1.9	3.9	0	0	0	0
0	30	80	0	0.8387	1.8	3.8	0	0	0	0
0	30	80	0	0.8424	1.7	3.9	0	0	0	0
0	30	80	0	0.9861	1.5	3.8	0	0	0	0
0	30	79	1	0.7153	1.2	3.4	1	1	1	1
0	30	79	1	1.1597	1.2	2.7	1	1	1	1
1	4	79	1	0.979	1.2	2.4	1	1	1	1
0	30	79	1	1.8145	1.2	2.4	1	1	1	1
0	30	79	1	0.9735	0.9	3.4	1	1	1	1
0	30	79	1	1.1545	0.9	3.3	1	1	1	1
0	30	79	1	1.0152	0.9	3.1	1	1	1	1
0	30	79	1	1.0152	0.9	3	1	1	1	1
0	30	79	1	1.0274	0.8	2.6	1	1	1	1
0	30	79	1	1.14	0.8	2.4	1	1	1	1
1	12	79	1	0.6389	0.7	2.5	1	1	1	1
0	30	79	1	1.4943	0.6	3.1	1	1	1	1
0	30	79	1	1.0879	0.5	3.4	1	1	1	1
1	23	79	1	1.14	0.5	3.1	1	1	1	1
1	4	79	1	1.7541	0.4	2.6	1	1	1	1
1	4	79	0	2.0986	1.4	3.4	1	1	1	1
0	30	79	0	0.9344	1.4	2.3	1	1	1	1
1	12	79	0	1.0302	1.2	3.2	1	1	1	1
0	30	79	0	0.6749	1.2	3.2	1	1	1	1
0	30	79	0	0.6587	1.1	3.2	1	1	1	1
0	30	79	0	1.2185	1.1	1.8	1	1	1	1
0	30	79	0	1.0302	1	3.1	1	1	1	1
1	2	79	0	1.2339	1	2.9	1	1	1	1
0	30	79	0	1.1692	1	2.9	1	1	1	1
0	30	79	0	0.6865	0.9	2.9	1	1	1	1
1	11	79	0	3.6769	0.9	2.3	1	1	1	1
0	30	79	0	0.6916	0.8	2.6	1	1	1	1
0	30	79	0	1.4796	0.6	3.4	1	1	1	1
0	30	79	0	1.2809	0.6	3.1	1	1	1	1
0	30	79	0	1.1545	0.6	2.6	1	1	1	1
1	4	79	0	1.9074	0.5	3	1	1	1	1
1	8	79	0	2.263	0.5	2.2	1	1	1	1
0	30	79	1	1.1667	3.4	3.2	1	0	0	1
0	30	79	1	0.629	3.1	2.5	1	0	0	1
0	30	79	1	1.8674	1.9	2.5	1	0	0	1
0	30	79	1	0.6916	1.7	3.3	1	0	0	1
0	30	79	1	1.0152	1.5	3.4	1	0	0	1
0	30	79	1	1.0302	1.5	3.2	1	0	0	1
1	2	79	0	0.7775	1.9	2.9	1	0	0	1
0	30	79	0	1.155	1.7	2.7	1	0	0	1
0	30	79	0	0.8387	1.6	3	1	0	0	1
0	30	79	0	1.3527	1.5	3.4	1	0	0	1
0	30	79	0	1.2935	1.5	3.3	1	0	0	1
0	30	79	1	0.7311	1.4	3.9	0	1	0	1
0	30	79	1	1.1912	1.3	3.5	0	1	0	1
0	30	79	1	1.0879	1.3	3.5	0	1	0	1
0	30	79	1	0.7864	1.2	4	0	1	0	1
0	30	79	1	0.7172	0.9	4.1	0	1	0	1
0	30	79	1	1.7541	0.6	3.6	0	1	0	1
0	30	79	0	1.1176	1.4	3.6	0	1	0	1
0	30	79	0	0.9308	1.1	4.3	0	1	0	1
1	27	79	0	1.4796	1	3.8	0	1	0	1
0	30	79	0	0.7619	0.8	3.9	0	1	0	1
0	30	79	0	1.4943	0.6	3.5	0	1	0	1
0	30	79	0	1.2051	0.5	4	0	1	0	1
0	30	79	0	1.4887	0.2	3.5	0	1	0	1
0	30	79	1	0.9404	3	4.1	0	0	0	0
0	30	79	1	1.5251	2.9	4.6	0	0	0	0
0	30	79	1	0.6587	2	4.1	0	0	0	0
0	30	79	1	0.6859	1.7	3.8	0	0	0	0
0	30	79	1	2.0014	1.6	3.8	0	0	0	0
0	30	79	1	1.0274	1.5	3.6	0	0	0	0
0	30	79	0	1.1924	3.4	3.5	0	0	0	0
0	30	79	0	1.1207	2.1	3.7	0	0	0	0
0	30	79	0	1.1667	1.7	4.1	0	0	0	0
0	30	79	0	1.0243	1.5	4.1	0	0	0	0
0	30	79	0	0.9308	1.5	3.7	0	0	0	0
0	30	78	1	1.2935	1.4	3.4	1	1	1	1
0	30	78	1	1.7541	1.1	1.2	1	1	1	1
0	30	78	1	1.2809	1	3.2	1	1	1	1
0	30	78	1	1.4887	1	2.3	1	1	1	1
0	30	78	1	0.9735	0.9	3.4	1	1	1	1
0	30	78	1	0.9041	0.9	2.9	1	1	1	1
0	30	78	1	1.14	0.9	2.7	1	1	1	1
0	30	78	1	0.9308	0.8	3.4	1	1	1	1
0	30	78	1	1.4748	0.8	2.1	1	1	1	1
0	30	78	1	1.2339	0.7	3.2	1	1	1	1
0	30	78	1	1.6096	0.7	3.1	1	1	1	1
0	30	78	1	1.3965	0.7	2.8	1	1	1	1
0	30	78	1	0.8387	0.7	2.5	1	1	1	1
0	30	78	1	0.7173	0.7	2.2	1	1	1	1
0	30	78	1	1.4796	0.7	1.7	1	1	1	1
0	30	78	1	1.0152	0.6	3.4	1	1	1	1
0	30	78	1	2.263	0.2	2.6	1	1	1	1
0	30	78	0	1.2182	1.4	2.8	1	1	1	1
0	30	78	0	1.0152	1.2	3.3	1	1	1	1
0	30	78	0	0.9041	1.1	3.2	1	1	1	1
0	30	78	0	1.2339	1.1	3.2	1	1	1	1
0	30	78	0	0.9939	1.1	2.9	1	1	1	1
0	30	78	0	1.4796	1	2.6	1	1	1	1
0	30	78	0	1.2182	0.8	2.9	1	1	1	1
0	30	78	0	1.1273	0.7	3.3	1	1	1	1
1	18	78	0	1.8417	0.7	2.5	1	1	1	1
0	30	78	0	2.263	0.5	2.5	1	1	1	1
0	30	78	0	1.0302	0.4	2.8	1	1	1	1
1	21	78	1	1.9074	5.7	2.3	1	0	0	1
0	30	78	1	1.2185	4.6	2.2	1	0	0	1
1	7	78	1	1.14	3.5	2.3	1	0	0	1
0	30	78	1	0.629	2.8	2.6	1	0	0	1
0	30	78	1	1.9074	2.5	3	1	0	0	1
1	1	78	1	1.2935	1.7	3.3	1	0	0	1
0	30	78	1	1.2809	1.7	3	1	0	0	1
0	30	78	1	1.14	1.6	3.3	1	0	0	1
0	30	78	1	1.9074	1.5	1.9	1	0	0	1
0	30	78	0	1.8674	3.1	2.9	1	0	0	1
0	30	78	0	1.2339	2.4	3.1	1	0	0	1
0	30	78	0	1.0655	1.7	3	1	0	0	1
1	24	78	1	0.7311	1.4	4.6	0	1	0	1
0	30	78	1	0.9404	1.4	3.9	0	1	0	1
0	30	78	1	1.0243	1.3	4.6	0	1	0	1
0	30	78	1	0.7172	1.3	3.9	0	1	0	1
1	9	78	1	0.6827	1.3	3.6	0	1	0	1
0	30	78	1	1.9074	1.2	3.9	0	1	0	1
0	30	78	1	0.9041	1.2	3.5	0	1	0	1
0	30	78	1	0.6138	1.1	4.3	0	1	0	1
0	30	78	1	1.9074	1	3.8	0	1	0	1
0	30	78	1	2.0667	1	3.7	0	1	0	1
0	30	78	1	1.2801	0.9	4.2	0	1	0	1
0	30	78	1	0.5544	0.9	3.6	0	1	0	1
0	30	78	1	1.9074	0.5	3.5	0	1	0	1
0	30	78	1	1.4887	0.3	4.3	0	1	0	1
0	30	78	0	0.8064	1.4	4.1	0	1	0	1
0	30	78	0	1.7151	1.3	4	0	1	0	1
0	30	78	0	0.9041	1.2	4	0	1	0	1
0	30	78	0	1.0243	1.2	3.6	0	1	0	1
0	30	78	0	0.5499	1.1	4	0	1	0	1
0	30	78	0	1.6457	0.7	3.9	0	1	0	1
0	30	78	0	1.1924	0.7	3.9	0	1	0	1
0	30	78	0	0.8377	0.6	4.1	0	1	0	1
0	30	78	1	1.9074	4.9	4	0	0	0	0
0	30	78	1	0.8064	3.3	3.8	0	0	0	0
0	30	78	1	0.7311	3.2	3.6	0	0	0	0
0	30	78	1	0.6138	2	3.7	0	0	0	0
0	30	78	1	1.2795	1.9	3.7	0	0	0	0
0	30	78	1	1.0243	1.6	3.8	0	0	0	0
0	30	78	1	1.0274	1.5	3.9	0	0	0	0
0	30	78	0	0.9939	1.6	3.5	0	0	0	0
0	30	78	0	0.9344	1.5	3.7	0	0	0	0
0	30	77	1	1.9074	1.2	3	1	1	1	1
0	30	77	1	1.2215	1.2	2.9	1	1	1	1
1	4	77	1	1.0243	1.2	2.7	1	1	1	1
0	30	77	1	1.4072	1.1	3.1	1	1	1	1
0	30	77	1	1.2185	1.1	2.9	1	1	1	1
1	6	77	1	0.6916	1.1	2.7	1	1	1	1
0	30	77	1	2.9317	1.1	1.8	1	1	1	1
0	30	77	1	1.2801	0.8	2.7	1	1	1	1
0	30	77	1	1.0243	0.8	2.6	1	1	1	1
0	30	77	1	1.2795	0.8	2	1	1	1	1
0	30	77	1	2.263	0.7	3.3	1	1	1	1
0	30	77	1	0.6138	0.6	2.5	1	1	1	1
0	30	77	1	0.7096	0.5	2.9	1	1	1	1
0	30	77	1	2.0667	0.5	2.8	1	1	1	1
1	26	77	1	1.6407	0.4	3	1	1	1	1
0	30	77	1	1.9074	0.4	2.4	1	1	1	1
1	27	77	1	1.1951	0.4	2.2	1	1	1	1
0	30	77	1	0.7173	0.3	2.6	1	1	1	1
1	5	77	1	1.2801	0.2	2.1	1	1	1	1
0	30	77	1	1.0838	0	3.4	1	1	1	1
0	30	77	0	0.9308	1.4	3.4	1	1	1	1
0	30	77	0	1.155	1.3	2.8	1	1	1	1
0	30	77	0	0.6269	1	3.4	1	1	1	1
0	30	77	0	0.6827	0.8	3.3	1	1	1	1
0	30	77	0	1.4943	0.8	2.9	1	1	1	1
0	30	77	0	1.9074	0.7	3.2	1	1	1	1
1	4	77	0	1.0952	0.7	2.1	1	1	1	1
0	30	77	0	1.4943	0.6	3.2	1	1	1	1
0	30	77	0	1.1924	0.5	3.3	1	1	1	1
0	30	77	0	1.4796	0.5	3.3	1	1	1	1
0	30	77	0	1.0152	0.4	3.2	1	1	1	1
1	11	77	0	1.0152	0.4	2.5	1	1	1	1
0	30	77	0	1.9521	0.4	2.1	1	1	1	1
1	3	77	0	0.9776	0.4	1.9	1	1	1	1
0	30	77	0	1.0302	0.3	2.8	1	1	1	1
0	30	77	0	1.0152	0.3	2.6	1	1	1	1
1	1	77	0	1.1924	0.2	3.1	1	1	1	1
0	30	77	0	1.9074	0.2	1.9	1	1	1	1
1	14	77	0	1.2935	0.1	2.5	1	1	1	1
1	2	77	0	1.14	0.1	1.8	1	1	1	1
0	30	77	1	0.7173	2.5	3.3	1	0	0	1
0	30	77	1	0.7146	2.3	3.1	1	0	0	1
0	30	77	1	0.979	1.8	3.4	1	0	0	1
0	30	77	1	1.2809	1.8	2.8	1	0	0	1
0	30	77	1	1.0243	1.7	3.3	1	0	0	1
0	30	77	1	1.9074	1.5	2.6	1	0	0	1
0	30	77	0	1.9074	7	2.9	1	0	0	1
0	30	77	0	0.8306	1.9	3.4	1	0	0	1
0	30	77	0	0.9939	1.7	1.7	1	0	0	1
0	30	77	0	0.7311	1.6	3.3	1	0	0	1
0	30	77	0	1.9074	1.5	2.3	1	0	0	1
0	30	77	1	1.1667	1.4	3.7	0	1	0	1
0	30	77	1	0.7392	1.2	3.7	0	1	0	1
0	30	77	1	0.6369	1.1	3.6	0	1	0	1
0	30	77	1	0.7173	1.1	3.6	0	1	0	1
0	30	77	1	2.263	1	3.7	0	1	0	1
0	30	77	1	0.9857	1	3.6	0	1	0	1
0	30	77	1	0.7153	0.7	3.8	0	1	0	1
0	30	77	1	0.7172	0.7	3.5	0	1	0	1
0	30	77	1	1.1924	0.5	3.8	0	1	0	1
0	30	77	0	1.1712	1.3	3.7	0	1	0	1
0	30	77	0	1.0772	1.3	3.6	0	1	0	1
0	30	77	0	1.4943	1.2	3.9	0	1	0	1
0	30	77	0	0.6916	1.2	3.8	0	1	0	1
0	30	77	0	0.6916	1.1	4.1	0	1	0	1
0	30	77	0	0.8204	1	4.2	0	1	0	1
0	30	77	0	1.0879	1	4	0	1	0	1
0	30	77	0	0.7173	0.8	4.3	0	1	0	1
0	30	77	0	2.0667	0.8	3.5	0	1	0	1
0	30	77	0	1.9074	0.7	3.7	0	1	0	1
0	30	77	0	0.721	0.6	4.2	0	1	0	1
1	2	77	0	0.722	0.6	3.7	0	1	0	1
0	30	77	0	0.6853	0.6	3.5	0	1	0	1
0	30	77	1	0.6865	2.1	3.6	0	0	0	0
0	30	77	1	0.7619	2	4.1	0	0	0	0
0	30	76	1	0.7153	1.3	3	1	1	1	1
0	30	76	1	1.5107	1.3	2.7	1	1	1	1
0	30	76	1	5.2068	1.2	3.3	1	1	1	1
0	30	76	1	0.6587	1.2	2.2	1	1	1	1
0	30	76	1	1.0243	1.1	2.2	1	1	1	1
0	30	76	1	1.2182	1	1.6	1	1	1	1
0	30	76	1	1.2185	0.9	3.2	1	1	1	1
0	30	76	1	1.9074	0.8	2.4	1	1	1	1
0	30	76	1	0.6916	0.7	2.9	1	1	1	1
0	30	76	1	1.2809	0.2	3.4	1	1	1	1
0	30	76	0	1.1273	1.4	2.4	1	1	1	1
1	26	76	0	1.7151	1.3	2.6	1	1	1	1
0	30	76	0	1.9074	1	2.4	1	1	1	1
0	30	76	0	0.7096	0.9	2.8	1	1	1	1
0	30	76	0	0.8377	0.7	3.3	1	1	1	1
0	30	76	0	1.2795	0.6	2.4	1	1	1	1
0	30	76	0	0.6857	0.2	1.9	1	1	1	1
0	30	76	1	0.8424	3.2	3.2	1	0	0	1
0	30	76	1	0.6916	1.8	3.2	1	0	0	1
0	30	76	1	0.7392	1.3	3.7	0	1	0	1
0	30	76	1	0.5499	1	3.9	0	1	0	1
0	30	76	1	0.7311	1	3.5	0	1	0	1
0	30	76	1	0.8606	0.8	4.2	0	1	0	1
0	30	76	1	0.6568	0.7	4.3	0	1	0	1
0	30	76	1	0.9344	0.7	3.6	0	1	0	1
0	30	76	1	0.9041	0.7	3.6	0	1	0	1
0	30	76	1	1.1545	0.7	3.5	0	1	0	1
0	30	76	0	1.2809	1.4	3.6	0	1	0	1
0	30	76	0	0.6369	1.3	3.9	0	1	0	1
0	30	76	0	1.0706	1.2	3.5	0	1	0	1
0	30	76	0	0.8387	0.9	4	0	1	0	1
0	30	76	0	1.155	0.6	3.5	0	1	0	1
1	21	76	0	0.8198	0.5	4.2	0	1	0	1
0	30	76	0	1.4796	0.5	3.8	0	1	0	1
0	30	76	0	1.0152	0.3	4.2	0	1	0	1
0	30	76	1	1.0879	3.1	3.9	0	0	0	0
0	30	76	1	1.0243	2.7	3.8	0	0	0	0
0	30	76	1	1.7361	2.5	3.5	0	0	0	0
0	30	76	1	0.5709	2.2	3.7	0	0	0	0
0	30	76	1	0.6812	2	3.7	0	0	0	0
0	30	76	1	1.155	1.9	3.5	0	0	0	0
0	30	76	1	1.0706	1.8	4.2	0	0	0	0
0	30	76	1	1.2185	1.8	3.6	0	0	0	0
0	30	76	1	0.9344	1.8	3.6	0	0	0	0
0	30	76	1	0.8198	1.7	3.7	0	0	0	0
0	30	76	1	0.7172	1.6	4.2	0	0	0	0
0	30	76	0	0.5709	3.1	3.7	0	0	0	0
0	30	76	0	1.1912	2.5	3.9	0	0	0	0
0	30	76	0	0.8606	2.3	4	0	0	0	0
0	30	76	0	0.5499	1.7	4.1	0	0	0	0
0	30	76	0	1.4863	1.7	3.9	0	0	0	0
1	11	75	1	1.0302	1	2.8	1	1	1	1
0	30	75	1	0.9857	0.9	3.1	1	1	1	1
1	7	75	1	1.1054	0.7	3.1	1	1	1	1
0	30	75	1	1.2185	0.7	2.9	1	1	1	1
0	30	75	1	1.8242	0.7	1.9	1	1	1	1
0	30	75	1	0.7864	0.6	2.7	1	1	1	1
0	30	75	1	2.1479	0.5	2.6	1	1	1	1
0	30	75	0	1.0706	1.4	3.2	1	1	1	1
1	24	75	0	0.6853	1.2	3	1	1	1	1
0	30	75	0	1.1692	1.1	2.9	1	1	1	1
0	30	75	0	1.0152	1	3.1	1	1	1	1
1	6	75	0	1.6407	0.9	3.2	1	1	1	1
0	30	75	0	1.4868	0.9	2.6	1	1	1	1
1	4	75	0	0.7575	0.8	3.3	1	1	1	1
0	30	75	0	0.9785	0.8	2.8	1	1	1	1
0	30	75	0	1.4887	0.7	2.8	1	1	1	1
0	30	75	0	1.14	0.6	1.6	1	1	1	1
0	30	75	0	0.9857	0.4	3	1	1	1	1
0	30	75	0	1.155	0.3	2.4	1	1	1	1
0	30	75	0	1.0152	0.2	2.7	1	1	1	1
0	30	75	0	1.7361	0.1	2	1	1	1	1
0	30	75	1	0.5709	4.3	3.4	1	0	0	1
0	30	75	1	1.0706	3.9	3.1	1	0	0	1
0	30	75	1	2.0667	2.8	3.1	1	0	0	1
0	30	75	1	2.0667	2.4	2.4	1	0	0	1
1	9	75	1	0.8276	1.9	2.8	1	0	0	1
0	30	75	1	1.2339	1.8	3.2	1	0	0	1
1	11	75	1	1.6407	1.8	2.4	1	0	0	1
1	12	75	1	0.9785	1.8	1.9	1	0	0	1
0	30	75	1	0.8377	1.6	2.5	1	0	0	1
1	3	75	1	1.0302	1.5	2.8	1	0	0	1
1	5	75	0	1.8159	2.2	2	1	0	0	1
0	30	75	0	0.6916	1.8	3.1	1	0	0	1
0	30	75	0	0.5709	1.6	3.4	1	0	0	1
0	30	75	0	1.4943	1.6	3.3	1	0	0	1
0	30	75	0	0.9892	1.6	2.5	1	0	0	1
0	30	75	0	1.9074	1.5	2	1	0	0	1
0	30	75	1	1.0706	1.4	3.6	0	1	0	1
0	30	75	1	1.0274	1.1	3.9	0	1	0	1
0	30	75	1	1.1545	0.7	3.9	0	1	0	1
0	30	75	1	0.9735	0.6	3.9	0	1	0	1
0	30	75	1	1.1054	0.5	3.7	0	1	0	1
0	30	75	0	1.0879	1.3	4.1	0	1	0	1
0	30	75	0	1.4796	1.3	3.8	0	1	0	1
0	30	75	0	0.7864	1.2	4.1	0	1	0	1
0	30	75	0	1.5637	1.2	3.7	0	1	0	1
0	30	75	0	1.0706	1.1	4.2	0	1	0	1
0	30	75	0	0.6615	1.1	4.1	0	1	0	1
0	30	75	0	0.8387	0.9	3.7	0	1	0	1
0	30	75	0	0.6916	0.7	3.7	0	1	0	1
0	30	75	0	1.9074	0.6	3.7	0	1	0	1
0	30	75	1	1.0879	2.9	3.8	0	0	0	0
0	30	75	1	0.722	2.6	3.6	0	0	0	0
0	30	75	1	0.6916	2.1	3.6	0	0	0	0
0	30	75	1	0.8606	1.6	3.8	0	0	0	0
0	30	75	1	0.6853	1.6	3.5	0	0	0	0
0	30	75	0	1.1667	1.9	4.1	0	0	0	0
0	30	75	0	1.0879	1.8	4	0	0	0	0
0	30	75	0	1.1912	1.7	4.6	0	0	0	0
0	30	74	1	0.7096	1.3	2.8	1	1	1	1
1	1	74	1	0.8198	1.2	3.2	1	1	1	1
0	30	74	1	0.9735	1.2	3.1	1	1	1	1
0	30	74	1	1.6593	1	3.1	1	1	1	1
0	30	74	1	1.7361	0.9	2.6	1	1	1	1
0	30	74	1	1.8674	0.5	3.3	1	1	1	1
0	30	74	1	1.9074	0.5	2.9	1	1	1	1
0	30	74	1	0.9857	0.3	3.2	1	1	1	1
1	12	74	1	1.4796	0.1	2.6	1	1	1	1
0	30	74	0	1.7541	1	2.3	1	1	1	1
0	30	74	0	1.1712	0.9	2.6	1	1	1	1
0	30	74	0	1.6407	0.8	3	1	1	1	1
1	6	74	0	1.4943	0.7	3.2	1	1	1	1
1	2	74	0	0.7172	0.6	2.6	1	1	1	1
0	30	74	0	1.2795	0.6	1.8	1	1	1	1
0	30	74	0	1.2801	0.5	2.9	1	1	1	1
0	30	74	0	2.0667	0.5	2.7	1	1	1	1
0	30	74	0	2.0667	0.3	3.2	1	1	1	1
0	30	74	0	1.0243	0.2	3.2	1	1	1	1
0	30	74	1	0.9939	4.8	2.9	1	0	0	1
0	30	74	1	1.9074	2.7	2.5	1	0	0	1
0	30	74	1	1.0152	2	3.3	1	0	0	1
0	30	74	0	0.935	2.3	3.1	1	0	0	1
0	30	74	0	0.6587	2.3	3.1	1	0	0	1
0	30	74	0	0.6749	2.2	2.3	1	0	0	1
0	30	74	0	0.8751	2	3.4	1	0	0	1
0	30	74	0	1.1667	1.5	3	1	0	0	1
0	30	74	1	0.6369	1.2	3.7	0	1	0	1
0	30	74	1	0.8198	1	3.9	0	1	0	1
0	30	74	1	0.6369	0.9	3.9	0	1	0	1
0	30	74	1	1.0152	0.8	3.7	0	1	0	1
0	30	74	1	1.1924	0.7	3.7	0	1	0	1
0	30	74	1	1.0302	0.4	3.5	0	1	0	1
0	30	74	1	0.7172	0.4	3.5	0	1	0	1
1	3	74	1	1.0879	0.3	3.5	0	1	0	1
1	13	74	0	1.0243	1.1	3.6	0	1	0	1
0	30	74	0	0.6865	0.6	3.7	0	1	0	1
0	30	74	0	0.6853	0.6	3.5	0	1	0	1
0	30	74	1	0.8204	3.1	3.9	0	0	0	0
0	30	74	1	0.6714	2.6	4.4	0	0	0	0
0	30	74	1	0.7173	2.3	3.6	0	0	0	0
0	30	74	1	1.0879	2.3	3.6	0	0	0	0
0	30	74	1	0.9041	2.2	4.1	0	0	0	0
0	30	74	1	1.0879	2	3.5	0	0	0	0
0	30	74	1	0.7311	1.8	3.8	0	0	0	0
0	30	74	1	0.722	1.8	3.7	0	0	0	0
1	4	74	1	1.0302	1.8	3.5	0	0	0	0
0	30	74	1	1.1667	1.6	4.2	0	0	0	0
0	30	74	1	0.5709	1.6	3.7	0	0	0	0
0	30	74	1	0.7311	1.5	4.2	0	0	0	0
0	30	74	1	1.2339	1.5	3.9	0	0	0	0
0	30	74	0	0.8064	2.4	3.8	0	0	0	0
0	30	74	0	0.5499	2.2	3.5	0	0	0	0
0	30	74	0	0.9308	1.7	3.7	0	0	0	0
0	30	74	0	1.0706	1.6	4.2	0	0	0	0
1	10	74	0	1.8503	1.6	3.8	0	0	0	0
0	30	74	0	0.8204	1.6	3.8	0	0	0	0
0	30	73	1	0.6568	1.4	3.1	1	1	1	1
1	20	73	1	0.7173	1.4	2.5	1	1	1	1
1	5	73	1	1.7361	1.4	2.1	1	1	1	1
0	30	73	1	1.0274	1.3	2.9	1	1	1	1
0	30	73	1	1.0243	1.2	3.1	1	1	1	1
0	30	73	1	1.8503	1.2	3	1	1	1	1
0	30	73	1	0.7957	1.2	2.7	1	1	1	1
0	30	73	1	0.7173	1.2	2.6	1	1	1	1
1	29	73	1	0.7173	1.2	2.2	1	1	1	1
1	22	73	1	1.2809	1.1	3.3	1	1	1	1
1	3	73	1	1.0879	1.1	3.1	1	1	1	1
0	30	73	1	1.1924	1	3.1	1	1	1	1
0	30	73	1	0.935	0.8	2.7	1	1	1	1
0	30	73	1	1.0611	0.7	2.9	1	1	1	1
0	30	73	1	1.2185	0.7	2.3	1	1	1	1
0	30	73	1	1.0302	0.5	3.2	1	1	1	1
0	30	73	1	1.4748	0.5	2.9	1	1	1	1
0	30	73	1	0.923	0.4	2.8	1	1	1	1
0	30	73	0	0.7146	1.1	3.3	1	1	1	1
0	30	73	0	1.8674	1	2.8	1	1	1	1
0	30	73	0	1.6593	0.8	2.6	1	1	1	1
0	30	73	0	1.1355	0.7	2.9	1	1	1	1
0	30	73	0	1.9074	0.7	2.9	1	1	1	1
0	30	73	0	1.9074	0.6	2.6	1	1	1	1
0	30	73	0	1.1597	0.5	2.8	1	1	1	1
0	30	73	0	0.8779	0.5	2.6	1	1	1	1
0	30	73	0	1.0649	0.5	2.3	1	1	1	1
1	8	73	0	1.155	0.4	3.4	1	1	1	1
0	30	73	0	1.9074	0.3	3.3	1	1	1	1
0	30	73	0	0.6714	0.3	2.8	1	1	1	1
0	30	73	0	1.2801	0.3	2.2	1	1	1	1
0	30	73	1	1.7361	2.4	2	1	0	0	1
0	30	73	1	0.7957	2.2	3	1	0	0	1
0	30	73	1	1.1924	2	3.2	1	0	0	1
0	30	73	1	0.8198	1.9	3.1	1	0	0	1
1	5	73	1	0.9548	1.7	2.7	1	0	0	1
0	30	73	1	0.9548	1.5	2.3	1	0	0	1
0	30	73	0	1.1545	2.4	3.3	1	0	0	1
0	30	73	0	1.6407	2	3.4	1	0	0	1
0	30	73	0	1.1667	1.5	3.3	1	0	0	1
0	30	73	1	0.7813	1.4	3.6	0	1	0	1
0	30	73	1	0.8387	1.3	4.2	0	1	0	1
0	30	73	1	1.1597	1	3.5	0	1	0	1
0	30	73	1	1.1924	0.9	3.5	0	1	0	1
0	30	73	1	1.2935	0.4	3.9	0	1	0	1
0	30	73	0	1.1924	1.4	3.6	0	1	0	1
0	30	73	0	1.0022	1.4	3.5	0	1	0	1
1	10	73	0	0.7173	1.2	4.3	0	1	0	1
0	30	73	0	0.935	1.2	3.9	0	1	0	1
0	30	73	0	0.5544	1.1	4.4	0	1	0	1
0	30	73	0	1.1912	1.1	3.9	0	1	0	1
1	2	73	0	1.2339	1	3.7	0	1	0	1
0	30	73	0	0.6853	0.9	3.5	0	1	0	1
1	19	73	0	1.2339	0.8	3.7	0	1	0	1
0	30	73	0	1.6457	0.8	3.5	0	1	0	1
0	30	73	0	0.9939	0.7	3.6	0	1	0	1
0	30	73	0	0.6916	0.4	3.8	0	1	0	1
0	30	73	0	0.8276	0.2	3.7	0	1	0	1
0	30	73	1	1.8417	3.4	4.2	0	0	0	0
0	30	73	1	0.8198	2.4	4.3	0	0	0	0
0	30	73	1	1.0879	2	4.1	0	0	0	0
1	22	73	1	0.8424	2	3.6	0	0	0	0
0	30	73	1	1.0879	1.9	4	0	0	0	0
0	30	73	1	0.583	1.7	3.6	0	0	0	0
0	30	73	1	0.8606	1.5	4.2	0	0	0	0
0	30	73	0	0.986	107.2	4.2	0	0	0	0
0	30	73	0	0.5709	2.6	4.2	0	0	0	0
0	30	73	0	0.9344	2.1	4	0	0	0	0
0	30	73	0	2.0014	2	4	0	0	0	0
0	30	72	1	1.0688	1.4	3	1	1	1	1
1	4	72	1	1.2544	1.4	2.8	1	1	1	1
0	30	72	1	1.9074	1.3	2.3	1	1	1	1
0	30	72	1	0.6812	1.2	3.1	1	1	1	1
0	30	72	1	1.1692	1.2	2.8	1	1	1	1
0	30	72	1	0.7411	1.2	2.8	1	1	1	1
0	30	72	1	1.9074	1.1	3.2	1	1	1	1
0	30	72	1	1.9074	0.9	2.9	1	1	1	1
0	30	72	1	1.0302	0.8	3.2	1	1	1	1
1	8	72	1	5.2068	0.8	1.3	1	1	1	1
0	30	72	1	1.2544	0.7	3.1	1	1	1	1
1	16	72	1	5.2068	0.6	1.8	1	1	1	1
0	30	72	1	2.263	0.5	3.2	1	1	1	1
0	30	72	1	1.9074	0.4	2.4	1	1	1	1
0	30	72	1	0.9939	0.3	2.6	1	1	1	1
1	6	72	0	0.6792	1.4	2.4	1	1	1	1
0	30	72	0	0.8204	1.3	3.4	1	1	1	1
0	30	72	0	0.7619	1.3	3.3	1	1	1	1
0	30	72	0	1.1545	1.2	2.9	1	1	1	1
0	30	72	0	1.2935	1	2.8	1	1	1	1
0	30	72	0	1.4796	0.9	2.9	1	1	1	1
0	30	72	0	0.5499	0.8	3.3	1	1	1	1
0	30	72	0	1.0649	0.8	2.8	1	1	1	1
0	30	72	0	0.7096	0.7	3.2	1	1	1	1
1	12	72	0	1.6457	0.7	3	1	1	1	1
1	11	72	0	1.0302	0.5	3.3	1	1	1	1
1	12	72	0	1.4796	0.5	2.7	1	1	1	1
0	30	72	0	1.9074	0.5	2.5	1	1	1	1
0	30	72	0	1.9074	0.5	1.8	1	1	1	1
0	30	72	0	1.9074	0.4	1.3	1	1	1	1
0	30	72	0	2.1886	0.3	2.9	1	1	1	1
1	15	72	0	1.0302	0.3	2.7	1	1	1	1
0	30	72	0	1.4796	0.2	3.1	1	1	1	1
0	30	72	0	1.1545	0.2	3	1	1	1	1
0	30	72	0	1.7361	0.2	3	1	1	1	1
0	30	72	0	0.8276	0.1	3.1	1	1	1	1
0	30	72	1	1.4072	3.4	2.3	1	0	0	1
0	30	72	1	0.5499	2.2	3.4	1	0	0	1
0	30	72	1	0.6701	1.9	3.3	1	0	0	1
0	30	72	1	1.0709	1.6	2.6	1	0	0	1
0	30	72	1	1.2809	1.5	3.4	1	0	0	1
0	30	72	0	1.6407	3.5	1.3	1	0	0	1
0	30	72	0	1.2809	2.4	3.4	1	0	0	1
0	30	72	0	2.263	2.3	3.3	1	0	0	1
1	2	72	0	0.6916	1.9	2.4	1	0	0	1
1	16	72	1	1.0952	1.4	3.9	0	1	0	1
0	30	72	1	0.7775	1.3	3.5	0	1	0	1
0	30	72	1	0.9041	1.1	3.8	0	1	0	1
0	30	72	1	0.659	1	4.1	0	1	0	1
0	30	72	1	0.5499	0.7	3.5	0	1	0	1
0	30	72	0	1.3965	1.4	3.7	0	1	0	1
0	30	72	0	0.9344	1.3	3.9	0	1	0	1
0	30	72	0	0.7173	1.2	3.8	0	1	0	1
0	30	72	0	0.7957	0.6	3.9	0	1	0	1
0	30	72	0	0.6853	0.6	3.5	0	1	0	1
0	30	72	1	1.0089	2.8	4.3	0	0	0	0
0	30	72	1	0.9041	2.8	4.2	0	0	0	0
0	30	72	1	1.0879	2.7	4.1	0	0	0	0
0	30	72	1	0.9776	2.4	4.1	0	0	0	0
0	30	72	1	0.9308	2.3	4	0	0	0	0
0	30	72	1	1.1054	2	3.6	0	0	0	0
0	30	72	1	1.2795	1.5	3.7	0	0	0	0
0	30	72	0	1.1667	2.3	3.9	0	0	0	0
0	30	72	0	0.5499	2.2	3.5	0	0	0	0
0	30	72	0	1.0879	1.9	4.1	0	0	0	0
0	30	72	0	0.659	1.9	3.6	0	0	0	0
0	30	72	0	1.0243	1.7	3.8	0	0	0	0
0	30	72	0	1.2339	1.6	4.1	0	0	0	0
0	30	71	1	1.4072	1.4	3.1	1	1	1	1
0	30	71	1	1.0152	1.2	3.2	1	1	1	1
0	30	71	1	0.9735	1	3.1	1	1	1	1
0	30	71	1	1.0152	0.8	3.2	1	1	1	1
1	2	71	1	2.0667	0.8	2.8	1	1	1	1
0	30	71	1	1.1924	0.7	2.6	1	1	1	1
1	9	71	1	1.9074	0.6	2.5	1	1	1	1
0	30	71	1	1.6376	0.6	2.3	1	1	1	1
0	30	71	1	0.7957	0.1	1.2	1	1	1	1
1	5	71	0	1.0152	1.2	2.9	1	1	1	1
0	30	71	0	1.9074	1.1	3.1	1	1	1	1
0	30	71	0	1.0879	0.9	3.3	1	1	1	1
1	27	71	0	1.4796	0.7	3.3	1	1	1	1
0	30	71	0	1.1924	0.5	3.2	1	1	1	1
0	30	71	0	1.9074	0.2	2.7	1	1	1	1
0	30	71	1	1.9074	2.3	2.6	1	0	0	1
1	1	71	1	0.9857	1.6	3.3	1	0	0	1
0	30	71	1	0.4867	1.5	2.8	1	0	0	1
0	30	71	0	1.2795	2.8	3	1	0	0	1
0	30	71	1	0.8198	1.3	4.2	0	1	0	1
0	30	71	1	0.8377	1.2	3.6	0	1	0	1
0	30	71	1	1.0706	1.2	3.5	0	1	0	1
0	30	71	1	0.9344	1	4.5	0	1	0	1
0	30	71	1	2.263	0.6	3.7	0	1	0	1
0	30	71	1	1.2809	0.6	3.6	0	1	0	1
0	30	71	1	0.722	0.5	3.6	0	1	0	1
1	18	71	1	0.6714	0.3	3.6	0	1	0	1
0	30	71	0	0.5499	1.3	3.6	0	1	0	1
0	30	71	0	0.7173	1.1	4.3	0	1	0	1
0	30	71	0	0.9017	1	3.8	0	1	0	1
0	30	71	0	1.6318	0.5	3.9	0	1	0	1
0	30	71	1	1.0879	2.8	4	0	0	0	0
0	30	71	1	0.5499	2.3	4	0	0	0	0
0	30	71	1	0.8198	1.8	3.9	0	0	0	0
1	12	71	1	1.0649	1.8	3.6	0	0	0	0
0	30	71	1	0.6827	1.6	3.7	0	0	0	0
0	30	71	1	0.6138	1.5	3.7	0	0	0	0
1	9	71	0	0.9785	62.6	3.5	0	0	0	0
0	30	71	0	0.7173	3.4	4.1	0	0	0	0
0	30	71	0	1.9074	3	3.6	0	0	0	0
0	30	71	0	0.7172	2.6	3.8	0	0	0	0
0	30	71	0	0.5499	2.1	3.6	0	0	0	0
0	30	71	0	0.5499	2.1	3.6	0	0	0	0
0	30	71	0	0.5499	1.9	3.7	0	0	0	0
0	30	71	0	1.1667	1.7	3.6	0	0	0	0
0	30	71	0	1.0879	1.5	3.6	0	0	0	0
0	30	70	1	1.0274	1.4	3.2	1	1	1	1
0	30	70	1	3.6769	1.2	2.6	1	1	1	1
0	30	70	1	1.5903	1.2	1.4	1	1	1	1
0	30	70	1	0.5499	0.8	3.3	1	1	1	1
0	30	70	1	1.2809	0.5	3	1	1	1	1
1	11	70	1	0.6615	0.5	2.6	1	1	1	1
0	30	70	0	0.8387	1.4	3.2	1	1	1	1
0	30	70	0	1.9074	1.1	3.3	1	1	1	1
1	11	70	0	1.2809	1	2.1	1	1	1	1
0	30	70	0	5.8305	1	2.1	1	1	1	1
0	30	70	0	0.7146	0.9	2.8	1	1	1	1
0	30	70	0	1.9074	0.7	3.4	1	1	1	1
0	30	70	0	1.2795	0.7	2.6	1	1	1	1
0	30	70	0	1.4887	0.7	1.6	1	1	1	1
1	28	70	0	1.7361	0.3	3.4	1	1	1	1
0	30	70	0	1.8145	0.2	3.1	1	1	1	1
0	30	70	0	1.0152	0.1	2.5	1	1	1	1
0	30	70	0	1.1545	0.1	1.5	1	1	1	1
0	30	70	1	0.7619	1.7	3.4	1	0	0	1
1	9	70	1	3.6769	1.5	3.2	1	0	0	1
0	30	70	0	1.0879	2.3	3.3	1	0	0	1
0	30	70	0	0.9785	1.5	3.3	1	0	0	1
1	8	70	1	0.9344	1.4	3.7	0	1	0	1
0	30	70	1	0.8198	1.3	3.6	0	1	0	1
0	30	70	1	0.7957	1.3	3.6	0	1	0	1
0	30	70	1	0.7146	1.2	3.6	0	1	0	1
0	30	70	1	0.935	0.7	4.2	0	1	0	1
0	30	70	1	1.2795	0.7	3.9	0	1	0	1
0	30	70	1	1.1667	0.7	3.8	0	1	0	1
0	30	70	0	0.583	1.3	4.4	0	1	0	1
0	30	70	0	0.6865	1.3	3.6	0	1	0	1
0	30	70	0	0.7146	1.1	4.1	0	1	0	1
0	30	70	0	1.0274	1	3.6	0	1	0	1
0	30	70	0	0.7173	0.9	3.6	0	1	0	1
0	30	70	0	1.0274	0.9	3.5	0	1	0	1
0	30	70	0	0.7311	0.5	3.5	0	1	0	1
0	30	70	0	1.2809	0.3	3.8	0	1	0	1
0	30	70	1	0.5499	2.3	3.9	0	0	0	0
0	30	70	1	0.7173	1.7	4	0	0	0	0
0	30	70	0	1.0274	3.3	3.8	0	0	0	0
0	30	70	0	1.9074	2.6	4.3	0	0	0	0
0	30	70	0	1.0243	1.8	3.7	0	0	0	0
0	30	70	0	1.7541	1.8	3.5	0	0	0	0
0	30	70	0	1.8503	1.7	3.7	0	0	0	0
0	30	70	0	0.8198	1.6	3.8	0	0	0	0
0	30	70	0	1.0706	1.5	3.9	0	0	0	0
0	30	70	0	1.0302	1.5	3.8	0	0	0	0
0	30	69	1	0.7619	0.9	3.3	1	1	1	1
0	30	69	1	1.8503	0.8	2.5	1	1	1	1
0	30	69	1	1.5596	0.8	2.4	1	1	1	1
0	30	69	1	1.9074	0.7	2.4	1	1	1	1
0	30	69	1	1.9074	0.5	3.4	1	1	1	1
0	30	69	1	1.1951	0.5	2.7	1	1	1	1
0	30	69	0	0.6147	1.2	3.2	1	1	1	1
0	30	69	0	1.9074	1	3.1	1	1	1	1
0	30	69	0	1.9074	0.9	1.9	1	1	1	1
0	30	69	0	1.0879	0.8	3.3	1	1	1	1
0	30	69	0	1.0274	0.7	3.2	1	1	1	1
0	30	69	0	1.1924	0.3	2.8	1	1	1	1
1	17	69	0	0.7864	0.2	2.5	1	1	1	1
0	30	69	0	1.7361	0.2	1.5	1	1	1	1
0	30	69	1	1.2935	2.4	3.1	1	0	0	1
1	3	69	1	1.155	2.2	3.4	1	0	0	1
0	30	69	1	1.4943	2.1	3.4	1	0	0	1
0	30	69	1	1.0152	1.9	3.4	1	0	0	1
0	30	69	1	0.9939	1.9	2.4	1	0	0	1
0	30	69	1	1.6593	1.7	3.2	1	0	0	1
0	30	69	1	1.7717	1.7	3.1	1	0	0	1
0	30	69	1	1.0152	1.6	3.2	1	0	0	1
0	30	69	1	0.9308	1.5	3	1	0	0	1
0	30	69	0	0.8064	2.4	3.1	1	0	0	1
0	30	69	0	0.9041	1.6	3.2	1	0	0	1
0	30	69	1	0.7173	1.4	3.8	0	1	0	1
0	30	69	1	1.0952	1.3	3.7	0	1	0	1
0	30	69	1	1.4943	1.2	3.9	0	1	0	1
0	30	69	1	1.1924	1.2	3.7	0	1	0	1
0	30	69	1	0.722	1.1	3.7	0	1	0	1
0	30	69	1	1.0274	1	4.1	0	1	0	1
0	30	69	1	1.6748	0.7	4.1	0	1	0	1
0	30	69	1	0.722	0.6	4.1	0	1	0	1
0	30	69	1	2.263	0.5	3.7	0	1	0	1
0	30	69	1	1.6096	0.5	3.5	0	1	0	1
0	30	69	0	1.6098	1.4	3.8	0	1	0	1
0	30	69	0	0.7172	1.4	3.5	0	1	0	1
0	30	69	0	0.6714	1.3	3.7	0	1	0	1
0	30	69	0	1.1924	1.1	4.4	0	1	0	1
0	30	69	0	1.8674	1	3.9	0	1	0	1
0	30	69	0	0.7191	0.9	3.7	0	1	0	1
0	30	69	0	0.7864	0.7	4.2	0	1	0	1
0	30	69	0	0.6865	0.5	3.8	0	1	0	1
0	30	69	1	0.8387	2.7	3.6	0	0	0	0
0	30	69	1	0.8387	2.5	4.1	0	0	0	0
0	30	69	1	0.6269	2.4	3.8	0	0	0	0
0	30	69	1	0.7864	2.1	3.8	0	0	0	0
0	30	69	1	1.0879	2	3.7	0	0	0	0
0	30	69	1	0.9939	1.9	3.6	0	0	0	0
0	30	69	1	1.1924	1.7	4.2	0	0	0	0
0	30	69	0	1.2809	2.4	3.9	0	0	0	0
0	30	69	0	0.5499	2.3	3.7	0	0	0	0
1	29	69	0	0.6714	1.9	4.2	0	0	0	0
0	30	69	0	0.6568	1.7	3.8	0	0	0	0
1	15	69	0	1.0879	1.7	3.6	0	0	0	0
0	30	69	0	0.9344	1.5	4.4	0	0	0	0
0	30	68	1	0.8387	1.4	3.2	1	1	1	1
0	30	68	1	0.8377	1.4	2.9	1	1	1	1
1	6	68	1	1.2185	1.4	2.7	1	1	1	1
0	30	68	1	1.1444	1.4	2.4	1	1	1	1
0	30	68	1	0.6916	1.4	1.5	1	1	1	1
0	30	68	1	2.0674	1.3	2.9	1	1	1	1
1	5	68	1	0.8204	1.3	1.8	1	1	1	1
1	15	68	1	1.9074	0.9	3.1	1	1	1	1
0	30	68	1	1.2544	0.7	2.9	1	1	1	1
0	30	68	1	2.263	0.7	2.8	1	1	1	1
0	30	68	1	1.0302	0.6	3.4	1	1	1	1
0	30	68	1	1.9074	0.6	1.9	1	1	1	1
1	13	68	1	1.2185	0.5	2.7	1	1	1	1
0	30	68	0	1.0879	1.3	3.2	1	1	1	1
1	9	68	0	5.8305	1.2	2.4	1	1	1	1
0	30	68	0	0.7311	1.1	3.4	1	1	1	1
0	30	68	0	1.1924	0.9	2.8	1	1	1	1
0	30	68	0	1.0706	0.9	2.7	1	1	1	1
0	30	68	0	0.7173	0.8	3.1	1	1	1	1
0	30	68	0	1.7361	0.7	2.5	1	1	1	1
0	30	68	0	1.0152	0.6	3.1	1	1	1	1
1	4	68	0	1.7361	0.5	2.7	1	1	1	1
1	29	68	0	5.8305	0.5	2.1	1	1	1	1
0	30	68	0	1.4796	0.4	3.3	1	1	1	1
0	30	68	0	0.6916	0.4	2.3	1	1	1	1
1	1	68	0	1.9074	0.4	1.9	1	1	1	1
1	3	68	0	5.8305	0.4	1.9	1	1	1	1
1	3	68	0	5.8305	0.2	2.4	1	1	1	1
1	27	68	1	1.9074	4.3	1.9	1	0	0	1
0	30	68	1	0.7957	4.2	2.8	1	0	0	1
0	30	68	1	1.9074	3.9	1.5	1	0	0	1
1	4	68	1	1.4943	2.5	3.4	1	0	0	1
1	27	68	1	2.5467	2.2	2.7	1	0	0	1
0	30	68	1	5.2068	2.1	2.3	1	0	0	1
1	25	68	1	5.8305	1.9	2.3	1	0	0	1
1	12	68	1	1.155	1.7	3.1	1	0	0	1
0	30	68	0	1.0879	2.2	3.3	1	0	0	1
0	30	68	0	1.155	2	3	1	0	0	1
0	30	68	0	2.263	1.9	3.3	1	0	0	1
0	30	68	0	1.8492	1.9	2.4	1	0	0	1
0	30	68	0	1.4887	1.6	2.1	1	0	0	1
0	30	68	0	0.8204	1.5	3.4	1	0	0	1
0	30	68	1	0.5709	1.4	3.9	0	1	0	1
0	30	68	1	1.2935	1.4	3.7	0	1	0	1
0	30	68	1	0.6161	1.3	3.8	0	1	0	1
0	30	68	1	0.7172	1.2	4	0	1	0	1
0	30	68	1	1.0302	1.2	3.9	0	1	0	1
0	30	68	1	0.7546	1	3.6	0	1	0	1
0	30	68	1	1.1545	0.9	3.5	0	1	0	1
0	30	68	1	1.0302	0.9	3.5	0	1	0	1
0	30	68	1	0.6827	0.7	3.8	0	1	0	1
0	30	68	1	1.6098	0.7	3.5	0	1	0	1
0	30	68	1	0.923	0.5	4.1	0	1	0	1
0	30	68	0	0.5499	1.4	3.6	0	1	0	1
0	30	68	0	0.7173	1	3.9	0	1	0	1
0	30	68	0	0.5499	0.7	3.9	0	1	0	1
0	30	68	0	1.4943	0.7	3.7	0	1	0	1
0	30	68	0	1.0302	0.7	3.6	0	1	0	1
1	24	68	0	1.155	0.6	3.7	0	1	0	1
0	30	68	0	1.4796	0.6	3.5	0	1	0	1
0	30	68	1	0.6865	2.1	4.1	0	0	0	0
0	30	68	1	0.8377	2.1	3.7	0	0	0	0
0	30	68	1	0.9939	2	3.9	0	0	0	0
0	30	68	1	0.7864	2	3.7	0	0	0	0
0	30	68	1	0.9735	1.6	3.8	0	0	0	0
0	30	68	1	1.2795	1.6	3.8	0	0	0	0
1	28	68	1	0.7173	1.5	4	0	0	0	0
0	30	68	0	1.0879	2.4	3.8	0	0	0	0
0	30	68	0	0.8198	2.4	3.7	0	0	0	0
0	30	68	0	0.5499	2.3	4.4	0	0	0	0
0	30	68	0	1.8503	2.3	3.6	0	0	0	0
0	30	68	0	0.5499	1.8	4	0	0	0	0
0	30	68	0	1.1667	1.8	3.6	0	0	0	0
0	30	67	1	1.0152	1.4	2.4	1	1	1	1
0	30	67	1	1.7361	1	2.8	1	1	1	1
0	30	67	1	5.2068	1	1.3	1	1	1	1
0	30	67	1	1.6376	0.7	2.6	1	1	1	1
0	30	67	1	0.9735	0.5	3.3	1	1	1	1
1	1	67	1	1.2182	0.5	2.4	1	1	1	1
1	13	67	1	2.0674	0.4	2.9	1	1	1	1
0	30	67	1	1.1924	0.4	2.9	1	1	1	1
0	30	67	0	1.0435	1.4	2.8	1	1	1	1
1	21	67	0	1.0274	1.3	3.1	1	1	1	1
0	30	67	0	1.2795	1.2	1.2	1	1	1	1
0	30	67	0	1.7361	1.1	2.1	1	1	1	1
0	30	67	0	1.2185	1	3	1	1	1	1
1	19	67	0	1.0649	1	2.9	1	1	1	1
1	9	67	0	0.629	1	2	1	1	1	1
0	30	67	0	1.1545	0.8	3.4	1	1	1	1
0	30	67	0	1.7361	0.5	2.5	1	1	1	1
0	30	67	0	1.6376	0.5	2.1	1	1	1	1
0	30	67	0	1.2809	0.4	2.4	1	1	1	1
0	30	67	0	1.8363	0.4	1.8	1	1	1	1
1	7	67	0	1.14	0.3	1.5	1	1	1	1
0	30	67	0	1.9074	0.2	2.8	1	1	1	1
1	13	67	0	1.14	0.2	1.7	1	1	1	1
0	30	67	0	1.9074	0.1	2.5	1	1	1	1
0	30	67	1	1.1692	7.1	2.3	1	0	0	1
0	30	67	1	0.9041	3.3	3.1	1	0	0	1
0	30	67	1	1.7541	2.6	1.9	1	0	0	1
1	6	67	1	1.1597	2.3	3.1	1	0	0	1
0	30	67	1	0.9584	1.9	3	1	0	0	1
0	30	67	1	1.2809	1.9	2	1	0	0	1
0	30	67	1	1.0152	1.8	3.2	1	0	0	1
0	30	67	1	0.6568	1.7	3.4	1	0	0	1
0	30	67	1	1.0879	1.5	3.4	1	0	0	1
0	30	67	0	1.0879	1.8	3.4	1	0	0	1
1	2	67	0	0.6513	1.6	2.9	1	0	0	1
0	30	67	1	1.7541	1.3	4.4	0	1	0	1
0	30	67	1	1.1667	1.1	3.7	0	1	0	1
0	30	67	1	0.9041	0.6	4	0	1	0	1
0	30	67	1	0.7462	0.5	3.7	0	1	0	1
0	30	67	0	0.7311	1.2	4.1	0	1	0	1
1	14	67	0	1.0274	1.1	3.5	0	1	0	1
0	30	67	0	1.1924	1.1	3.5	0	1	0	1
0	30	67	0	0.6393	1	3.7	0	1	0	1
0	30	67	0	0.5499	0.8	4	0	1	0	1
0	30	67	0	0.9735	0.8	3.7	0	1	0	1
0	30	67	0	0.935	0.6	3.9	0	1	0	1
0	30	67	0	1.2919	0.5	3.5	0	1	0	1
0	30	67	1	2.9568	3.4	4	0	0	0	0
0	30	67	1	0.6916	3.3	3.8	0	0	0	0
0	30	67	1	1.0879	2.2	4.2	0	0	0	0
0	30	67	1	1.4252	1.8	3.6	0	0	0	0
0	30	67	1	1.2339	1.7	3.8	0	0	0	0
0	30	67	0	1.8674	5.7	3.7	0	0	0	0
0	30	67	0	0.4867	4	4.1	0	0	0	0
0	30	67	0	1.0879	2.4	3.8	0	0	0	0
0	30	67	0	1.0879	1.7	3.9	0	0	0	0
0	30	66	1	0.7173	1.3	3	1	1	1	1
0	30	66	1	1.4943	1.2	2.8	1	1	1	1
0	30	66	1	1.2339	1	2.8	1	1	1	1
0	30	66	1	1.0152	1	2.3	1	1	1	1
0	30	66	1	0.7619	0.8	3.4	1	1	1	1
0	30	66	1	1.6407	0.4	3.1	1	1	1	1
0	30	66	0	0.8377	1.3	3.4	1	1	1	1
0	30	66	0	1.4943	0.6	2.9	1	1	1	1
0	30	66	0	5.8305	0.5	1.6	1	1	1	1
0	30	66	0	1.4943	0.4	2.4	1	1	1	1
0	30	66	0	0.9776	0.3	2.5	1	1	1	1
0	30	66	0	2.8123	0.3	2.4	1	1	1	1
0	30	66	0	1.7541	0.2	2.3	1	1	1	1
0	30	66	1	1.2185	2.1	3.1	1	0	0	1
0	30	66	1	1.0879	1.8	3.2	1	0	0	1
0	30	66	0	1.8018	3	2.5	1	0	0	1
0	30	66	1	0.7173	1.4	3.8	0	1	0	1
0	30	66	1	0.7172	1.4	3.7	0	1	0	1
0	30	66	1	1.0879	1.2	4	0	1	0	1
0	30	66	1	0.7172	1	4.1	0	1	0	1
0	30	66	0	0.5499	1.3	3.5	0	1	0	1
0	30	66	0	1.1667	1.2	3.9	0	1	0	1
0	30	66	1	1.6021	4.5	3.5	0	0	0	0
0	30	66	1	1.9521	2.1	3.6	0	0	0	0
0	30	66	1	1.1667	1.9	3.8	0	0	0	0
0	30	66	1	0.6138	1.9	3.7	0	0	0	0
0	30	66	1	0.9041	1.9	3.5	0	0	0	0
0	30	66	1	0.8306	1.7	3.6	0	0	0	0
0	30	66	1	1.1924	1.5	3.8	0	0	0	0
0	30	66	0	0.8387	3.6	4.1	0	0	0	0
0	30	66	0	1.4943	2.2	3.9	0	0	0	0
0	30	66	0	0.6865	1.8	3.9	0	0	0	0
0	30	66	0	1.6407	1.6	3.5	0	0	0	0
0	30	66	0	0.6369	1.5	4	0	0	0	0
0	30	65	1	1.0706	1.3	3.4	1	1	1	1
0	30	65	1	1.2215	1.2	2.6	1	1	1	1
1	25	65	1	2.263	1.1	2.9	1	1	1	1
0	30	65	1	1.8145	1.1	2.6	1	1	1	1
0	30	65	1	1.6593	0.8	3	1	1	1	1
0	30	65	1	1.1924	0.3	3	1	1	1	1
0	30	65	1	1.4943	0.2	2.7	1	1	1	1
0	30	65	0	0.6615	1.4	3.4	1	1	1	1
0	30	65	0	0.7957	0.9	3.3	1	1	1	1
1	6	65	0	0.6615	0.8	3.1	1	1	1	1
0	30	65	0	0.6916	0.1	2.4	1	1	1	1
0	30	65	0	2.9317	0	2.6	1	1	1	1
0	30	65	1	0.7957	2.4	3.1	1	0	0	1
0	30	65	1	1.1924	2	3.2	1	0	0	1
0	30	65	1	0.9041	1.9	3.3	1	0	0	1
1	5	65	1	0.7173	1.8	3.4	1	0	0	1
0	30	65	1	1.9479	1.8	3.2	1	0	0	1
0	30	65	1	1.0152	1.8	3.2	1	0	0	1
0	30	65	1	0.6276	1.8	3	1	0	0	1
0	30	65	1	1.8242	1.8	1.7	1	0	0	1
0	30	65	1	1.9074	1.7	3	1	0	0	1
0	30	65	1	0.9939	1.7	2.4	1	0	0	1
0	30	65	1	1.9074	1.7	2.2	1	0	0	1
0	30	65	1	0.8751	1.6	3.1	1	0	0	1
0	30	65	0	0.6216	2.2	2.1	1	0	0	1
0	30	65	0	1.6096	2.1	2.9	1	0	0	1
0	30	65	0	0.9041	2	2.5	1	0	0	1
0	30	65	0	1.2361	1.5	3.4	1	0	0	1
0	30	65	0	1.2795	1.5	3.1	1	0	0	1
0	30	65	0	1.0706	1.5	3.1	1	0	0	1
0	30	65	0	0.8377	1.5	2.8	1	0	0	1
0	30	65	1	0.7173	1.4	3.9	0	1	0	1
0	30	65	1	0.5709	1.4	3.5	0	1	0	1
0	30	65	1	1.2809	1.3	3.9	0	1	0	1
0	30	65	1	0.7173	1.1	3.7	0	1	0	1
0	30	65	1	1.2215	0.9	3.6	0	1	0	1
0	30	65	1	1.1924	0.6	4	0	1	0	1
0	30	65	1	0.9344	0.5	4.3	0	1	0	1
0	30	65	1	0.9735	0.5	3.6	0	1	0	1
0	30	65	1	1.2907	0.5	3.5	0	1	0	1
0	30	65	0	0.9041	1.4	4	0	1	0	1
0	30	65	0	1.1667	1.3	3.6	0	1	0	1
0	30	65	0	1.6407	1.2	3.8	0	1	0	1
0	30	65	0	0.8198	1.1	4	0	1	0	1
0	30	65	0	0.9785	1.1	3.9	0	1	0	1
0	30	65	0	1.4943	1.1	3.8	0	1	0	1
0	30	65	0	0.5499	1	3.7	0	1	0	1
0	30	65	0	0.8306	0.9	3.8	0	1	0	1
0	30	65	0	0.9041	0.8	3.5	0	1	0	1
0	30	65	0	1.2809	0.7	3.9	0	1	0	1
0	30	65	0	2.0667	0.4	3.5	0	1	0	1
0	30	65	1	0.9041	3.2	4.3	0	0	0	0
0	30	65	1	1.0879	3.1	3.7	0	0	0	0
0	30	65	1	0.6916	2.9	3.8	0	0	0	0
0	30	65	1	0.7173	2.5	3.9	0	0	0	0
0	30	65	1	0.7173	2.3	3.6	0	0	0	0
0	30	65	1	0.8198	2.2	3.9	0	0	0	0
0	30	65	1	0.8204	2.1	3.8	0	0	0	0
0	30	65	1	0.5499	1.5	3.7	0	0	0	0
0	30	65	0	0.6757	3.1	4	0	0	0	0
1	13	65	0	1.4943	2.1	3.7	0	0	0	0
0	30	65	0	0.6138	1.9	3.7	0	0	0	0
0	30	65	0	2.013	1.7	3.7	0	0	0	0
0	30	65	0	0.507	1.6	3.8	0	0	0	0
0	30	65	0	0.7146	1.6	3.8	0	0	0	0
